# 1 **Integrating top-down and bottom-up approaches to understand the genetic** 2 **architecture of speciation across a monkeyflower hybrid zone**

3  
4 Sean Stankowski<sup>1,2\*</sup>, Madeline A. Chase<sup>1,3</sup>, Hanna McIntosh<sup>1,4</sup> and Matthew A. Streisfeld<sup>1\*</sup>

5 <sup>1</sup>Institute of Ecology and Evolution, 5289 University of Oregon, Eugene, OR 97403, USA

6 <sup>2</sup>Present address: IST Austria, AM1 Campus, Klosterneuburg, Austria.

7 <sup>3</sup>Present address: Department of Evolutionary Biology, Evolutionary Biology Centre (EBC),  
8 Uppsala University, Uppsala, Sweden

9 <sup>4</sup>Present address: Department of Entomology, University of Wisconsin – Madison, Madison, WI

10 \*Corresponding authors

## 11 **ORCID ids:**

12 SS: <https://orcid.org/0000-0003-0472-9299>;

13 MAC: <https://orcid.org/0000-0002-7916-3560>;

14 MAS: <https://orcid.org/0000-0002-2660-8642>

15 HRM: <https://orcid.org/0000-0003-2547-5347>

16 **Key words:** Barrier traits, Barrier loci, Cline, Ecotypes, *Mimulus*, Reproductive isolation, QTL

17 **Running title:** Speciation in a monkeyflower hybrid zone

18

## 19 **Abstract**

20 Understanding the phenotypic and genetic architecture of reproductive isolation is a longstanding  
21 goal of speciation research. In many systems, candidate barrier traits and loci have been  
22 identified, but causal connections between them are rarely made. In this study, we combine ‘top-  
23 down’ and ‘bottom-up’ approaches with demographic modeling toward an integrated  
24 understanding of speciation across a monkeyflower hybrid zone. Previous work in this system  
25 suggests that pollinator-mediated reproductive isolation is a primary barrier to gene flow  
26 between two divergent red- and yellow-flowered ecotypes of *Mimulus aurantiacus*. Several  
27 candidate floral traits contributing to pollinator isolation have been identified, including a  
28 difference in flower color, which is caused primarily by a single large-effect locus (*MaMyb2*).  
29 Other anonymous SNP loci, potentially contributing to pollinator isolation, also have been  
30 identified, but their causal relationships remain untested. Here, we performed demographic  
31 analyses, which indicate that this hybrid zone formed by secondary contact, but that subsequent  
32 gene flow was restricted in a large fraction of the genome by barrier loci. Using a cline-based  
33 genome scan (our bottom-up approach), we demonstrate that candidate barrier loci are broadly  
34 distributed across the genome, rather than mapping to one or a few ‘islands of speciation.’ A  
35 QTL analysis (our top-down approach) revealed most floral traits are highly polygenic, with little  
36 evidence that QTL co-localize, indicating that most traits are largely genetically independent.  
37 Finally, we find little convincing evidence for the overlap of QTL and candidate barrier loci,  
38 suggesting that some loci contribute to other forms of reproductive isolation. Our findings  
39 highlight the challenges of understanding the genetic architecture of reproductive isolation and

40 reveal that barriers to gene flow aside from pollinator isolation may play an important role in this  
41 system.

42

## 43 **Introduction**

44 Understanding the phenotypic and genetic architecture of reproductive isolation is a  
45 major goal of modern speciation research [1-3]. Early studies took a ‘top-down’ approach by  
46 using quantitative trait locus (QTL) mapping and other association methods to detect genomic  
47 regions controlling barrier phenotypes or genetic incompatibilities [4-6]. More recently, ‘bottom-  
48 up’ approaches, such as genome scans of genomic differentiation (e.g.,  $F_{ST}$ ) or admixture (e.g.,  
49  $f_d$ ), have identified candidate barrier loci in numerous systems, including those where isolation is  
50 thought to result from ecologically-based divergent selection or intrinsic incompatibilities [7-10].

51 Although both approaches have clear strengths, they also present significant challenges  
52 [11]. Top-down methods require that traits involved in reproductive isolation have already been  
53 identified, so our understanding of the genetic architecture of speciation can only ever be as  
54 complete as our knowledge of the traits controlling reproductive isolation in the system. In  
55 contrast, bottom-up approaches can provide a comprehensive view of the genomic landscape of  
56 speciation without complete knowledge of the isolating traits (but see [3, 12]). However, even  
57 though candidate barrier loci can be identified, their causal relationship with previously  
58 identified barrier traits usually remains unclear. This is because speciation usually involves many  
59 different isolating barriers (e.g., pre- and post-zygotic, extrinsic and intrinsic) [13, 14] that can  
60 become coupled together through different aspects of the speciation process [15-17]. Although  
61 the coupling of different barriers eases speciation by generating a stronger overall barrier [16,  
62 17], the resulting linkage disequilibrium (LD) among barrier loci makes it difficult to understand  
63 their individual contributions to barrier traits. For example, a barrier locus identified in a genome  
64 scan might underlie an obvious phenotypic difference, or it may underlie a completely different  
65 barrier that is less conspicuous or that has yet to be discovered.

66 Therefore, instead of relying on one approach, many researchers have advocated for the  
67 integration of top-down and bottom-up methods [3, 11, 18]. However, this kind of integration is  
68 missing from most studies of speciation, meaning that any links between candidate barrier traits  
69 and barrier loci remain tentative. To date, some of the best efforts to integrate top-down and  
70 bottom-up analyses have made use of natural hybrid zones between divergent populations [19].  
71 Hybrid zones have been described as natural laboratories, because they allow us to understand  
72 how reproductive isolation and barriers to gene flow play out in the real world [20]. In addition,  
73 their presence provides compelling evidence for ongoing gene flow between the taxa being  
74 studied, the relative duration of which can now be estimated using demographic inference  
75 methods. Moreover, cline theory provides a rich, spatially explicit framework for studying  
76 selection and gene flow across porous species boundaries [21-23]. Specifically, the shape and  
77 position of geographic clines are impacted by the relative effects of selection and gene flow  
78 across a hybrid zone [22]. Cline analysis has clear advantages over population genetic summary  
79 statistics used in most selection scans (e.g.,  $F_{ST}$ ), and it can be applied to phenotypic traits [24].

80 However, it is only beginning to be applied to genome-scale datasets [24-28]. In this study, we  
81 combine top-down and bottom-up analyses to investigate the phenotypic and genetic architecture  
82 of pollinator isolation between hybridizing ecotypes of the bush monkeyflower (*Mimulus*  
83 *aurantiacus*).

84 In San Diego County, California, there is a sharp geographic transition between red- and  
85 yellow-flowered ecotypes of *M. aurantiacus* ssp. *puniceus* [29]. Despite being very closely  
86 related ( $d_a = 0.005$ ; [30], the ecotypes show extensive divergence across a suite of floral traits,  
87 including color, size, shape, and placement of reproductive parts (Fig. 1; [29, 31, 32]). Previous  
88 work suggests an important role of pollinators in driving floral trait divergence and reproductive  
89 isolation in this system [29, 33-36]. Field experiments have shown that hummingbirds and  
90 hawkmoths show strong preferences and constancy for the flowers of the red and yellow  
91 ecotypes, respectively [34, 36]. In addition to providing a source of divergent selection,  
92 pollinator behavior generates substantial pre-mating isolation, potentially reducing gene flow  
93 between the ecotypes by 78% in sympatry [36]. Post-mating isolation is weak between the  
94 ecotypes, suggesting that pollinator isolation is the primary barrier to gene flow in this system  
95 [36].

96 Although the strength of pollinator-mediated reproductive isolation is strong, it is  
97 incomplete, meaning that there is potential for gene flow between the ecotypes in locations  
98 where their distributions overlap. This has led to the formation of a narrow hybrid zone,  
99 characterized by extensive phenotypic variation and geographic clines in several floral traits. For  
100 example, there is a steep cline in flower color that is centered on the hybrid zone and matches a  
101 similarly steep cline in the gene *MaMyb2*, which controls much of the variation in pigmentation  
102 [35]. Other floral traits and anonymous single-nucleotide polymorphisms (SNPs) also show  
103 clinal variation, implying that multiple traits contribute to reproductive isolation [24, 33].  
104 However, evidence for an association between these phenotypic traits and genotypic signatures  
105 of selection is currently lacking.

106 In this study, we use demographic modeling, a cline-based genome scan, and QTL  
107 mapping to investigate the history of divergence and the connection between phenotypic and  
108 genomic signatures of selection in this system. One possible outcome is that QTL for the  
109 divergent phenotypes will overlap with regions of the genome under selection, as predicted if  
110 pollinator-mediated selection is the main barrier to gene flow between the ecotypes. These  
111 regions may be abundant and widespread across the genome, reflecting polygenic divergence, or  
112 they may consist of one or a few genomic regions enriched for loci that underlie multiple floral  
113 traits. Under an alternate scenario, we may find that floral QTL only partially overlap with  
114 genomic signatures of selection, which might reflect the spatial coupling of multiple different  
115 kinds of barriers. Our findings highlight the challenges of understanding the genetic architecture  
116 of reproductive isolation, and suggest that barriers to gene flow aside from pollinator isolation  
117 may also contribute to speciation in this system.

118  
119  
120  
121  
122  
123  
124  
125  
126  
127  
128  
129  
130  
131  
132  
133  
134  
135  
136  
137  
138  
139  
140  
141  
142  
143  
144  
145  
146  
147  
148  
149  
150  
151  
152  
153  
154  
155  
156  
157  
158  
159

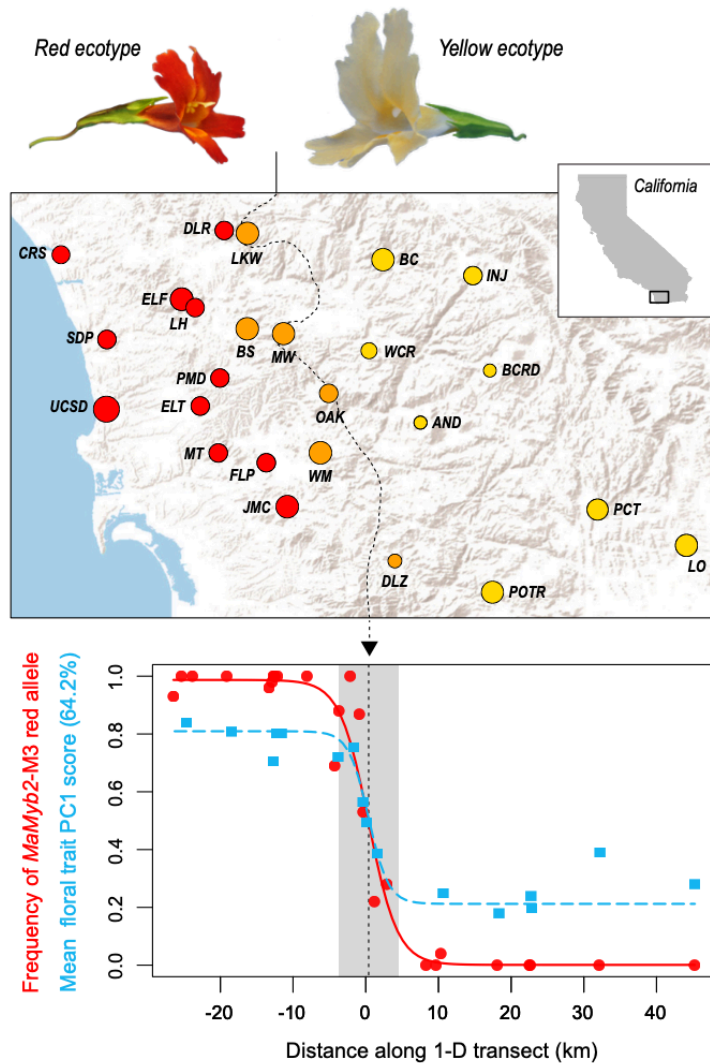

**Figure 1. Clinal variation across a bush monkeyflower hybrid zone. (top)** Typical flower phenotypes of the red and yellow ecotypes, and a map of the 25 sampling locations in San Diego County. The size of the circles shows variation in the sample sizes, which range from 4 to 18 individuals, totaling 292 individuals. The dashed line indicates the center of the hybrid zone, previously inferred from spatial variation in the frequency of alternative alleles at the *MaMyb2* locus. **(bottom)** Clines in allele frequency at the *MaMyb2* locus (red circles) and the mean floral trait PC1 score (blue squares) across the one-dimensional transect. The solid and dashed lines are the ML sigmoid cline models for *MaMyb2* allele frequency and trait PC1 score, respectively. The gray shaded rectangle represents the width of the hybrid zone.

## Methods

### *RAD* sequencing, read filtering, and SNP calling

We identified SNPs using previously sequenced restriction-site associated DNA sequences (RADseq) from 292 individuals sampled from 25 locations across the hybrid zone

160 (mean individuals per site = 12; range 4–18) [24]. These included 11 sites in the range of the red  
161 ecotype, 8 sites in the range of the yellow ecotype, and 6 sites in the hybrid zone (Table S1).

162 We processed the raw sequences, identified SNPs, and called genotypes using *Stacks* v.  
163 1.41 [37]. Reads were filtered based on quality, and errors in the barcode sequence or RAD site  
164 were corrected using the *process\_radtags* script in *Stacks*. Individual reads were aligned to the  
165 *M. aurantiacus* genome [30] using *Bowtie 2* [38], with the *very\_sensitive* settings. We identified  
166 SNPs using the *ref\_map.pl* function of *Stacks*, with two identical reads required to create a stack  
167 and two mismatches allowed when processing the catalog. SNP identification and genotype calls  
168 were conducted using the maximum-likelihood model ( $\alpha = 0.01$ ) [39]. To include a SNP in  
169 the final dataset, we required it to be present in at least 70% of all individuals; this resulted in a  
170 final dataset of 219,152 SNPs.

171

### 172 *Demographic inference*

173 To gain a deeper understanding of the history of gene flow and selection in this system,  
174 we performed demographic inference in  $\partial\text{a}\partial\text{i}$  [40]. We calculated the unfolded joint site  
175 frequency spectrum (JSFS) based on 19,902 SNPs, using subspecies *grandiflorus* as an outgroup  
176 to polarize alleles as ancestral or derived [41]. SNPs were included if they were genotyped in  
177 *grandiflorus* and in at least 70% of the red and yellow individuals. We included 124 individuals  
178 from 10 sites of the red-flowered ecotype and 65 individuals from 7 sites of the yellow-flowered  
179 ecotype, excluding sample sites that showed evidence of recent admixture (all hybrid sample  
180 sites and populations DLR and BC). The JSFS was projected to a sample size of 85 to maximize  
181 the number of segregating sites.

182 We fit nine two-population demographic models to the JSFS (Fig. S1): (i) strict isolation (SI),  
183 (ii) ancient migration (AM), (iii) isolation with migration (IM), (iv) secondary contact (SC), and  
184 (v) periods of secondary contact (PSC). The remaining four models—(vi) *AM2m*, (vii) *IM2m*,  
185 (viii) *SC2m*, and (ix) *PSC2m*—are the same as models ii-v, except that migration rates are  
186 inferred for two groups of loci to simulate the effect of a porous barrier to gene flow. For each  
187 model, we performed 20 independent runs using randomly generated starting parameters, and we  
188 reported the results for the run with the lowest log-likelihood. The goodness of fit of the models  
189 was determined using the AIC. Parameter estimates were converted into biologically meaningful  
190 values as described in [42], assuming a mutation rate of  $7 \times 10^{-9}$  [43].

191

### 192 *Admixture analysis*

193 We used the model-based clustering program *Admixture* [44] to characterize patterns of  
194 genetic structure across the hybrid zone. We assigned the 292 individuals sampled from across  
195 San Diego County into two clusters ( $K=2$ ) based on the full dataset of 219,152 SNPs that met our  
196 filtering requirements (note that  $K=2$  was determined as the optimum number of clusters in [24]).  
197 In addition to using the full dataset, we also pruned SNPs using the *--indep-pairwise* function in  
198 *Plink* [45] to reduce linkage disequilibrium (LD) between neighboring SNPs ( $r^2$  threshold of 0.1,  
199 window size = 50 SNPs, step size = 10 SNPs).

200 We also ran *Admixture* separately for each chromosome, and for 2,173 non-overlapping  
201 windows, each containing 100 SNPs (mean window size of 89.1 kb with 8 - 38 RAD tags per  
202 window Fig. S2) The window-based analysis was automated using custom python scripts to  
203 produce plink.map and .ped files for each consecutive window, which were then passed to  
204 *Admixture*.

#### 205 206 *Cline fitting*

207 To quantify the geographic variation in ancestry ( $Q$ ), we fit a sigmoid cline model to the mean  
208 ancestry scores from each site along a one dimensional transect, which was described in [24]  
209 (Fig. 1). Clines were fitted using *HZAR* [46] using the quantitative trait model, with the variance  
210 in the trait modeled separately on the left side, center, and right side of the cline. We estimated  
211 the following parameters: the cline center ( $c$ ), defined as the inflection point of the sigmoid  
212 function;  $Q_{\text{left}}$  and  $Q_{\text{right}}$ , the mean ancestry scores on the left and right sides of the cline,  
213 respectively; and the cline width ( $w$ ), defined as the ratio between the total change in ancestry  
214 across the cline ( $\Delta Q$ ) and the slope at the cline center (note that  $\Delta Q = Q_{\text{left}} - Q_{\text{right}}$  because we  
215 ensured that the mean ancestry score was higher on the left side before fitting). We conducted 3  
216 independent fits with random starting values and retained the one with the highest log-likelihood.  
217 All of the best fits were visually inspected to ensure a sensible fit.

#### 218 219 *Summarizing clinal variation in windows*

220 After cline fitting, we calculated an *ad-hoc* statistic to identify genomic windows that had  
221 clines with a similar shape and position to the genome-wide cline. We refer to this statistic as the  
222 cline similarity score ( $cs$  score). Unlike individual parameters (e.g. the width or center), which  
223 describe a single feature of a cline, the  $cs$  score describes the shape and relative position of a  
224 cline with a single number. We calculate the cline similarity score as:  $cs = [\Delta Q / (w + l)] e^{-(|c/l|)^2}$ .  
225 Briefly (but see Supplement S1 for more details), the total change in ancestry,  $\Delta Q$ , is divided by  
226 the sum of  $w$  and a scaling variable ( $w + l$ ) to give an estimate of cline shape. The scaling  
227 variable controls the spread of shape scores across the joint distribution of  $\Delta Q$  and  $w$ . In our case,  
228  $l =$  half the length of the transect ( $0.5t$ ), which results in high shape scores when clines have high  
229  $\Delta Q$  and low  $w$ , but low shape scores when clines have low  $\Delta Q$  and high  $w$ . The shape score is  
230 then scaled according to the position of the cline center,  $c$ , relative to a position of interest. This  
231 could be a feature of the environment or a cline in a focal marker or trait. In our case, the  
232 position of interest is the center of the genome-wide ancestry cline. If the cline center coincides  
233 exactly with this point, then the shape score is equal to the  $cs$  score. However, the farther that the  
234 cline center is shifted away from the point of interest, the more the shape score is downgraded,  
235 resulting in a lower estimate of  $cs$ . Therefore, to have a high value of  $cs$ , a cline from a genomic  
236 window must have its shape and position closely match the cline in genome-wide ancestry (as in  
237 Fig. 3A). Finally, we scaled the  $cs$  score relative to the genome-wide ancestry cline, where 1 is  
238 the  $cs$  score calculated for the genome-wide ancestry cline, and 0 is the minimum value of  $cs$   
239 observed for a window.

240 *Estimates of genetic differentiation in genomic windows*

241 To characterize levels of genetic differentiation in a more traditional way, we calculated  
242 the population genetic statistic  $F_{CT}$  between the ecotypes in each 100 SNP window using the  
243 program *Arlequin* [47]. This was done in an analysis of molecular variance framework that  
244 partitioned genetic variation between the ecotypes, among populations within ecotypes, and  
245 within populations. Populations were classified as coming either from the red or yellow ecotypes  
246 based on the *Admixture* results. Samples from hybrid populations were excluded from this  
247 analysis.

248

249 *QTL analysis*

250 We used QTL analysis to identify genomic regions underlying divergent floral traits. We  
251 generated an outcrossed  $F_2$  population that contained 292 offspring produced by crossing two  $F_1$   
252 individuals; each of these  $F_1$  parents was produced by crossing different greenhouse-raised red  
253 and yellow ecotype plants (from populations UCSD and LO; Table S1). To allow direct  
254 phenotypic comparison among plants grown in a common environment, we raised 25 red ecotype  
255 individuals (location UCSD), 31 yellow ecotype individuals (location LO) and 20  $F_1$  individuals  
256 (LO x UCSD) alongside the  $F_2$ s. For each plant, we measured 13 floral traits (Fig. S3). Plants  
257 were raised as described in [33].

258 QTL mapping was conducted using *R/qtl* [48] and a previously published genetic map  
259 [30] generated from the same mapping population using *Lep-MAP2* [49]. We used phase  
260 information from *Lep-MAP2* to infer the grandparental origin of alleles in the  $F_2$ s at 7574  
261 mapped markers, which allowed us to recode them as coming either from a red or yellow  
262 grandparent. This set of markers was then reduced down to 2631—one per map position—by  
263 retaining the marker at each map position with the least missing data. Missing data for these  
264 markers was inferred by imputation using phase information from the mapping software. For  
265 each trait, we then used automated stepwise scanning for additive QTL and pairwise interactions.  
266 QTL identified using this procedure were then incorporated into a multi-QTL model to refine  
267 their positions, calculate 95% Bayes credible intervals, and estimate the percent phenotypic  
268 variation explained (i.e., the effect size) of each QTL.

269

270 *Test for an excess of QTL overlap*

271 To test for co-localization among QTL, we used a permutation test to determine if there  
272 was significantly more overlap among QTL than expected by chance. We first estimated the  
273 observed number of overlaps based on the Bayes credible intervals among the 26 identified QTL  
274 using the *findOverlaps* function of the *GenomicRanges* package [50] in R and determined the  
275 average number of overlaps per QTL ( $n$  overlaps/ $n$  QTL). To determine if this statistic was  
276 significantly larger than expected by chance, we randomly generated new QTL positions while  
277 maintaining the observed number and size of observed QTL. We made the probability of QTL  
278 ‘landing’ on a given chromosome (Chr) a function of that chromosome’s length ( $L_i$ ) relative to  
279 the total genome length ( $L_T$ ),  $P(\text{Chr}_i) = L_i / L_T$ , so that larger chromosomes were more likely to

280 have QTL  $i$  assigned to them. We calculated the mean number of overlaps per QTL for 9,999  
281 random datasets and estimated a  $p$ -value for the observed value as the number of permuted  
282 datasets where  $n$  overlaps/ $n$  QTL was equal to or greater than the observed estimate + 1/number  
283 of permutations +1.

284

#### 285 *Test for overlap of QTL and outlier windows*

286 We also used a permutation test to determine if QTL regions were enriched for outliers  
287 identified in our cline and  $F_{CT}$  based genome scans. We first counted the observed number of  
288 outlier windows within the empirical QTL intervals. This was performed for both  $cs$  and  $F_{CT}$   
289 outliers, defined using two different cutoffs (top 1% and 5% of the empirical distributions). To  
290 determine if these counts were significantly different from chance, we produced 9,999 datasets  
291 where the genomic position of outlier windows was randomized, and we counted the number of  
292 outliers falling inside the empirical QTL intervals. A  $p$ -value for the estimate was calculated as  
293 described above.

294

## 295 **Results**

### 296 *Evidence for a history of heterogeneous gene flow*

297 The results of our demographic modeling support a history of gene flow across the range  
298 of the ecotypes. First, demographic models that included contemporary gene flow were far better  
299 at recreating the observed JSFS than a model of divergence without gene flow (i.e., strict  
300 isolation;  $-\Delta AIC = 3938$ ), or the best model of ancient migration, which included historical but  
301 not contemporary gene flow ( $-\Delta AIC = 1157$ ) (Fig. 2; Fig. S4). Second, models that included  
302 heterogeneous migration across the genome ( $2m$ ) were always strongly favored over the  
303 equivalent models, where gene flow was modeled with a single rate (Fig. 2). Third, the SC and  
304 PSC models, which included periods of allopatry and secondary contact, were strongly favored  
305 over the IM model, where divergence occurred without a period of geographic isolation. The  
306 best-fitting model was the SC $2m$  model, indicating that divergence of the red and yellow  
307 ecotypes included a period of allopatry followed by gene flow upon secondary contact (Fig. 2).  
308 Assuming a mutation rate of  $7 \times 10^{-9}$  [43], the ML parameters indicate that the ecotypes have been  
309 exchanging an average of 37 migrants per generation ( $m_{YR} = 34.5$  per gen.;  $m_{RY} = 40.3$  per gen.)  
310 for the last 1,800 generations, which equates to roughly 3,600 years, assuming a two-year  
311 generation time for these perennial plants. Despite evidence that gene flow between the ecotypes  
312 has been extensive, the ML model suggests that 37.4% of loci have experienced a substantial  
313 reduction in effective migration (15-20 fold;  $m_{eYR} = 1.7$  per gen.;  $m_{eRY} = 2.7$  per gen.) due to the  
314 effects of selection against gene flow (Fig. 2).

315

316

317

318



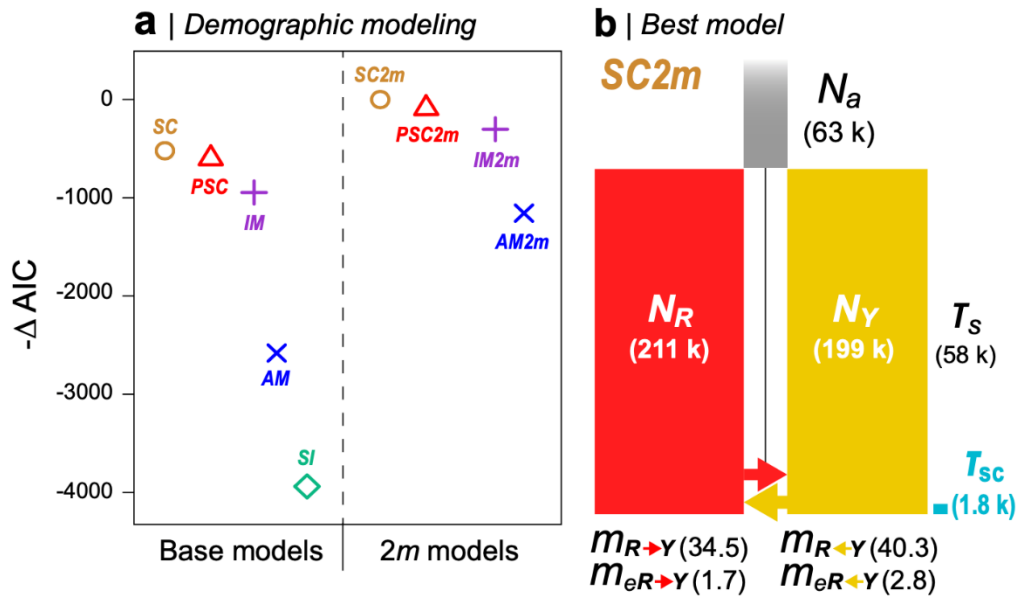

335 **Figure 2. Demographic modeling reveals a history of gene flow following isolation.** (a)  $-\Delta AIC$   
 336 scores for the 9 demographic models fitted to the observed JSFS using  $\partial a \partial i$ . The base models (left of the  
 337 dashed line) include a single migration parameter ( $m$ ) for all loci, whereas the 2m models include  
 338 separate migration parameters for neutral loci ( $m$ ) and loci affected by a barrier to gene flow ( $m_e$ ). The  
 339 best model (SC2m) has a  $-\Delta AIC$  of 0, with more negative values indicating that models were a poorer fit.  
 340 (b) A graphical depiction of the SC2m model. The width of the columns is proportional to the population  
 341 size estimates for the ancestral ( $N_a$ ), red ( $N_R$ ), and yellow ( $N_Y$ ) populations. The height of the red and  
 342 yellow bars is proportional to the total time in generations ( $T_S$ ) that has passed since the split. The blue  
 343 bar shows the period during which secondary gene flow ( $T_{Sc}$ ) occurred. The difference in arrow size is  
 344 proportional to the difference in the bi-directional migration rate,  $m$ . The rates of effective migration ( $m_e$ )  
 345 are too small to show graphically.

346  
 347

#### 348 *Sharp clines in genome- and chromosome-wide ancestry*

349 The presence of sharp clines in multiple floral traits suggests that some fraction of the  
 350 genome is impacted by selection against gene flow [33]. The results from *Admixture* support  
 351 these findings, revealing genome-wide patterns of ancestry that closely match the ecotypic  
 352 designations assigned based on floral phenotypes (Fig. S5). Specifically, red- and yellow-  
 353 flowered individuals sampled from either side of the hybrid zone were strongly assigned to  
 354 alternate clusters, while individuals from hybrid populations tended to show some assignment to  
 355 both clusters, indicating their genomes are a mix of red and yellow ancestry. The results are  
 356 nearly identical between independent runs of *Admixture* that include the full dataset or subsets of  
 357 the data pruned to minimize LD between neighboring SNPs ( $r^2 > 0.999$ ).

358 To compare these changes in ancestry to the observed geographic variation in floral traits,  
 359 we used cline analysis to fit a sigmoid cline to the mean ancestry scores from each site. The best-  
 360 fitting cline model provides an excellent summary of the change in ancestry across the transect  
 361 (Fig. 3a) and has an extremely similar shape to cline models from the divergent floral traits and

362 molecular markers (Fig. 1). In addition, consistent with the increased variance we observed in  
363 multiple phenotypic traits in hybrid populations [33], the standard deviation of ancestry scores is  
364 higher in sample sites close to the cline center, thus providing genomic evidence for  
365 hybridization (Fig. 3a).  
366

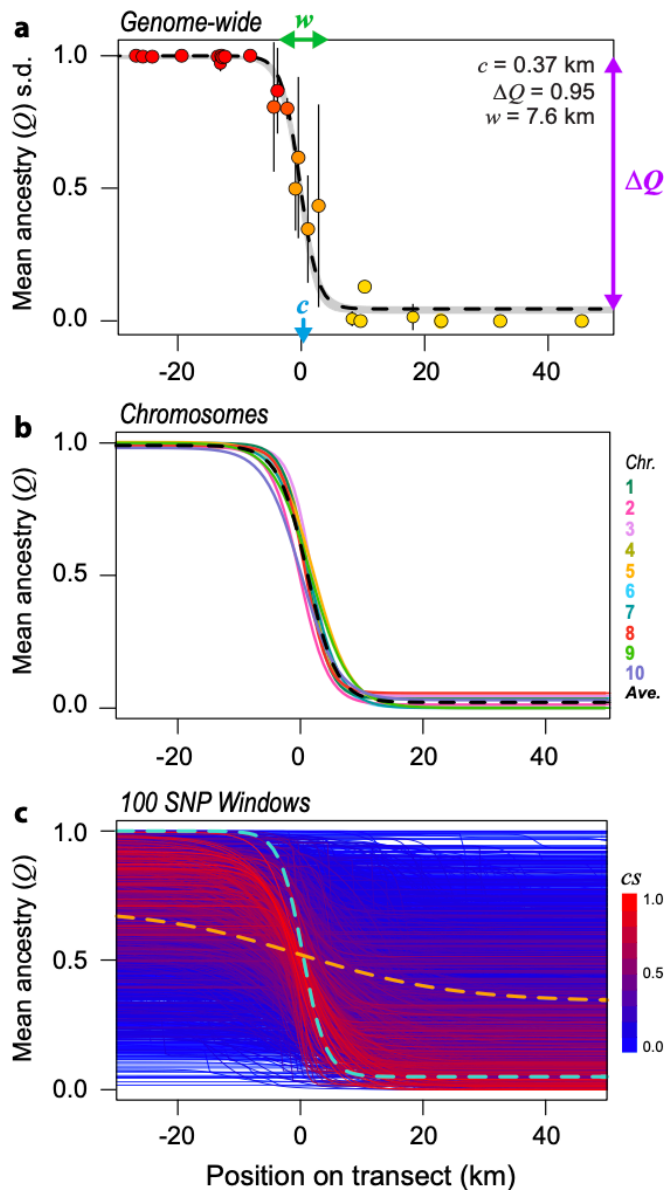

**Figure 3. Clines in ancestry scores at different scales of genomic organization. (a)** Genome-wide cline, inferred from the mean ancestry (Q) scores in each population along the 1-D transect. Position 0 on the horizontal axis corresponds to the cline center estimated from *MaMyb2* allele frequencies (see Fig. 1). The vertical bars show the standard deviation in ancestry scores for each population. The dashed line is the ML cline model, and the gray band is the two-unit support envelope. Three parameters of interest, including the cline center ( $c$ ), width ( $w$ ), and total change in ancestry across the cline ( $\Delta Q$ ), are indicated on the plot. **(b)** Ancestry clines estimated separately for each chromosome. Only the ML curves are shown for clarity (but see Fig. S6). The dashed line is the mean cline, estimated by taking the average of the ML parameters for all chromosomes. **(c)** Ancestry clines estimated for 2,173, 100-SNP windows. The dashed cyan line shows the cline shape for the genome-wide cline (as shown in panel a), while the dashed orange line is the mean cline shape, estimated by taking the average of the ML parameters obtained for all windows. Each solid line is the ML sigmoid curve for one of the genomic windows. The curves are colored according to the value of the cline similarity score ( $cs$ ), which indicates how similar the shape and position of each cline is to the genome-wide cline. Redder clines are more similar to the genome-wide cline and bluer clines are less similar (See main text for more details).

401

402 The *Admixture* scores provide additional genetic evidence for restricted gene flow across  
403 the hybrid zone, but they give us no indication as to the number of loci involved or their genomic  
404 distribution. For example, the differences in ancestry could be driven by a small number of loci  
405 that reside on a single chromosome, or they could reflect more widespread genomic divergence,  
406 involving loci scattered across multiple chromosomes. By repeating the cline analysis of ancestry

407 scores separately for each chromosome, we find highly consistent clines in ancestry for all 10  
408 chromosomes (Fig. 3b, Fig. S6).

409

#### 410 *Heterogeneous clinal variation across the genome*

411 To understand how cline shape varies at a finer genomic scale, we fit clines to 2173 non-  
412 overlapping 100-SNP windows. This analysis revealed broad variation in geographic patterns of  
413 ancestry (Fig. 3c). Unlike each chromosome, the majority of windows show little or no spatial  
414 change in ancestry between the red and yellow ecotypes, translating into very low *cs* scores  
415 (mean *cs* = 0.15; s.d. = 0.15, Fig. 4).

416 However, some genomic regions show clines in ancestry that strongly resemble the  
417 genome wide cline, suggesting that they contain barrier loci. This includes the window with the  
418 highest *cs* score (*cs* = 0.91), which contains the known barrier locus, *MaMyb2*. The shape and  
419 position of this window-based ancestry cline ( $\Delta Q = 0.95$ ,  $w = 10.4$  km,  $c = -0.3$  km) is highly  
420 similar to the genome-wide cline in ancestry ( $\Delta Q = 0.95$ ,  $w = 7.6$  km,  $c = 0.37$  km) and to the  
421 cline in allele frequency for a SNP in *MaMyb2* (*MaMyb2*-M3 marker:  $\Delta P = 0.99$ ,  $w = 8.1$  km,  $c$   
422 =  $-0.07$  km [24]. However, rather than a clear set of outliers, we observe a continuous  
423 distribution of *cs* scores. Therefore, we use two arbitrary cutoffs (top 1% and 5% of the  
424 distribution of *cs* scores) to define a set of candidate windows potentially containing barrier loci.

425 Regardless of which cutoff we use, these candidate barrier regions are broadly distributed  
426 across the genome. For the 5% cutoff, they occurred on all 10 chromosomes (5 - 20 windows per  
427 chromosome; for the 1% cutoff, they occur on 9 of the 10 chromosomes with 1 - 4 windows per  
428 chromosome). There were only 12 cases where candidate windows were directly adjacent,  
429 indicating that they also were broadly distributed within each chromosome. We also find that  
430 genetic differentiation is higher for candidate regions than for the genomic background (1%  
431 mean  $F_{CT} = 0.31$ , 5% mean  $F_{CT} = 0.23$ , overall mean  $F_{CT} = 0.07$ ). However,  $F_{CT}$  explains only  
432 38% of the variation in *cs* scores (Fig. S7).

433

#### 434 *Most candidate barrier traits are polygenic*

435 We used quantitative trait locus (QTL) mapping to identify regions of the genome  
436 associated with candidate barrier traits. The 13 floral traits showed significant differences  
437 between pure red and yellow ecotype plants when grown in a common environment, with mean  
438 trait values differing by 0.9 to 7.1 standard deviations (Fig. S8). A total of 26 QTL were  
439 identified. For nine traits, we identified more than one QTL (range 2 - 4), and QTL were located  
440 on all 10 linkage groups, with LG 7 containing QTL for seven different traits (Fig. 4, Figs. S9  
441 and S10). On average, each QTL explained 9.9% of the variation in the F<sub>2</sub> population (range  
442 1.82% - 62.6%) (Fig. S11), with an average total variation explained for each trait of 19.8%. The  
443 exception was a large-effect QTL for anthocyanin content on LG 4 that explained 62.6% of the  
444 variation and mapped to a region near the previously identified causal locus *MaMyb2* [35]. Thus,  
445 despite clear heritable differences in these traits, QTL analysis was able to explain only a modest  
446 amount of the segregating variation, indicating that most traits have a polygenic architecture.

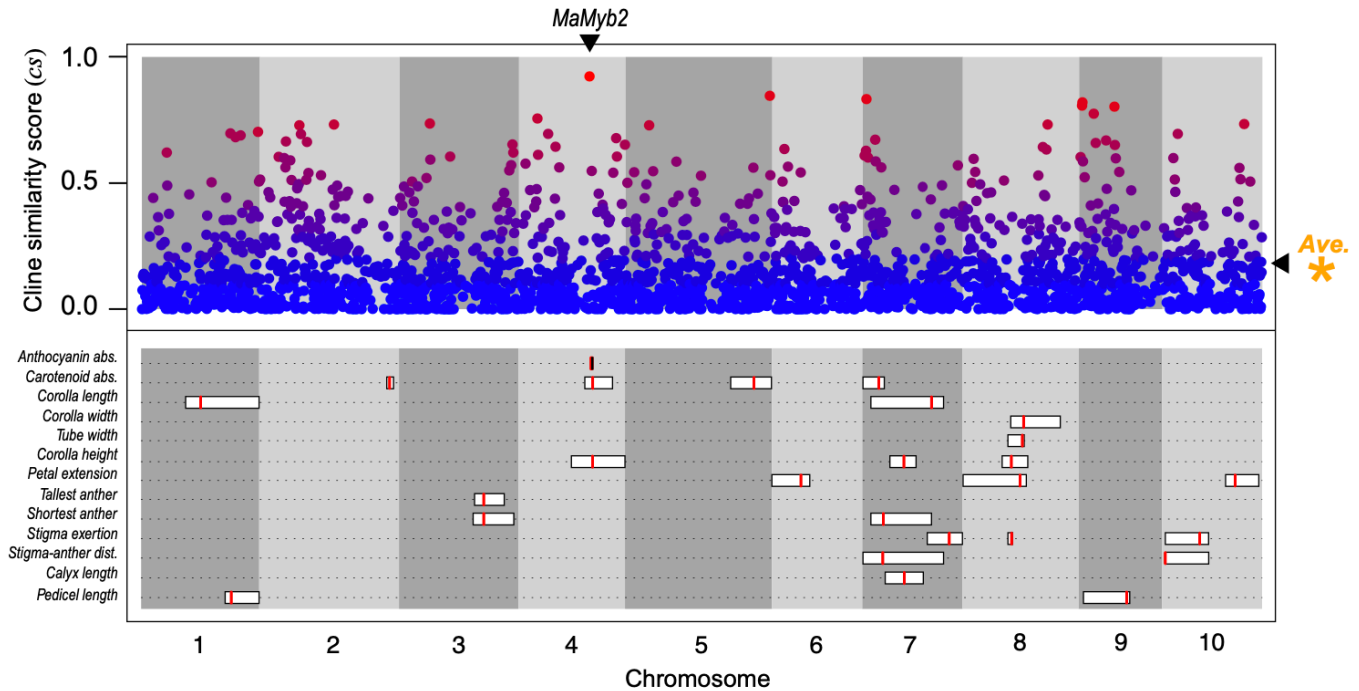

447  
448 **Figure 4. Cline-based genome scan and locations of QTL for floral traits.** (top) The scaled cline  
449 similarity ( $cs$  score) score in each 100 SNP window plotted against the physical position of the window in  
450 the bush monkeyflower genome. The points are colored as in Fig. 3c, with redder points containing  
451 windows with  $cs$  scores that are more similar to the genome-wide pattern and bluer points are less similar  
452 (See main text for more details). The orange asterisk denotes the average barrier score among all  
453 windows. The position of the *MaMyb2* gene that controls differences in flower color is shown. (bottom)  
454 The positions of the QTL for the 13 measured floral traits plotted along the physical position of the  
455 genome. The red vertical line corresponds to the best estimate of the QTL peak, and the width of the  
456 rectangles denotes the 95% Bayes credible intervals of the estimated QTL position.

457  
458 The presence of multiple QTL occurring on the same chromosome indicates that some  
459 regions may contribute to multiple traits, which would help maintain trait associations in hybrid  
460 offspring [17]. Overall, we find that QTL do tend to co-localize more often than would be  
461 expected by chance (mean observed overlap of 3.23 QTL; mean permuted overlap = 2.51 QTL;  $p$   
462 = 0.042, Fig. S12). However, the effects of this co-localization are seen most strongly only for  
463 size-related traits (e.g. corolla length and height of the tallest anther), which remain highly  
464 correlated in the  $F_2$  generation ( $r = 0.88$ ) (Fig. S13). By contrast, the average correlation  
465 coefficient among all other pairs of traits was much lower (mean absolute value of  $r = 0.26$ ). For  
466 example, the three overlapping QTL on LG 4 that control anthocyanin and carotenoid  
467 pigmentation, as well as corolla height, span a total physical distance of only 76 kb. However,  
468 these traits show weak correlations in the  $F_2$  population (anthocyanin vs carotenoid:  $r = 0.18$ ;  
469 anthocyanin vs corolla height:  $r = -0.20$ ; carotenoid vs corolla height:  $r = 0.19$ ). This shows that  
470 the QTL overlap would have little effect on maintaining the phenotypic correlations where  
471 hybridization occurs.

472 *Low concordance between QTL and outlier regions*

473 Finally, we tested for overlap between the floral trait QTL and the candidate barrier regions from  
474 the cline-based and  $F_{CT}$  genome scans. Using a permutation test, we tested whether genomic  
475 windows with higher  $cs$  scores tended to overlap with QTL more often than expected by chance.  
476 Regardless of which cutoff we used (e.g. top 1% or top 5% of  $cs$  scores), we found that floral  
477 trait QTL were not significantly enriched for candidate barrier regions ( $p > 0.3$ , Fig. S14). This  
478 suggests a complex connection between the genetic and phenotypic architecture of reproductive  
479 isolation. The results were the same when we defined candidate barrier regions based on  $F_{CT}$   
480 (e.g. top 1% or top 5% of the  $F_{CT}$  distribution; Fig. S14).

481 Given that wide QTL intervals reduce the power of the enrichment test, we also asked  
482 how often the estimate of the QTL peak fell within a candidate barrier window. However, even  
483 when using the 5% cutoff, we found that none of the QTL peaks occurred within candidate  
484 barrier regions. This included the QTL for floral anthocyanin, where the QTL peak occurs 589  
485 kb from the window containing the causal locus, *MaMyb2*.

486

487 **Discussion**

488 In this study, we used a combination of QTL mapping and population genomic analyses  
489 to obtain a deeper understanding of the phenotypic and genetic architecture of reproductive  
490 isolation in a hybrid zone. Past studies in this system have separately identified candidate floral  
491 traits contributing to pollinator-mediated reproductive isolation [33, 34], and anonymous,  
492 candidate barrier loci [24]. Here, we use top-down and bottom-up approaches in an effort to  
493 connect phenotypic and genetic candidates. These results are discussed in the context of new  
494 insights about the history of divergence revealed by demographic analysis and are aided by a  
495 known, large-effect barrier locus (*MaMyb2*) with a clear phenotypic effect.

496

497 *The history of divergence: new insights from demographic analysis*

498 A firm understanding of the historical demography of speciation is essential when  
499 interpreting divergence across hybrid zones [51, 52]. In zones that are at demographic  
500 equilibrium, it is possible to interpret clines in terms of migration, selection, and drift and  
501 sampling effects [22]. However, if hybrid zones formed recently, clines in neutral loci or traits  
502 will be steep initially, but they will decay over time [22]. Previous work in this system revealed  
503 patterns of isolation-by-distance across (and orthogonal) to the hybrid zone that were consistent  
504 with a long-term ‘stepping-stone’ pattern of gene flow across the entire range of the study area  
505 [33]. In fact, there was no evidence for substantial genome-wide differentiation between the  
506 ecotypes after correcting for the effect of geography. Based on this result, Stankowski et al. [33]  
507 concluded that the hybrid zone formed due to one of three possible scenarios: (i) a primary origin  
508 with continuous gene flow during divergence, (ii) a secondary origin, where divergence occurred  
509 in allopatry, followed by extensive gene flow after contact resumed, or (iii) a secondary origin  
510 where the period of allopatry was short.

511 Our demographic analyses provide new evidence that this hybrid zone formed from  
512 secondary contact after a long period of isolation. Indeed, both models that included periods of  
513 geographic isolation (SC and PSC) were a better fit to the data than models of continuous gene  
514 flow (IM). The parameter estimates for the preferred model (SC2 $m$ ) indicate a relatively long  
515 period of isolation, followed by a period of secondary contact that began roughly 1,800  
516 generations ago. It is important to note that we fit relatively simple models to the data that  
517 excluded changes in population size in the ancestral and daughter populations and variation in  $N_e$   
518 along the genome. Recent work has shown that failure to model key parameters can result in  
519 incorrect inference under some circumstances [53]. Although more sophisticated modelling may  
520 arrive at different conclusions in the future, these results point to a secondary origin of this  
521 hybrid zone.

522 In terms of the main goal of our paper, the key result of the demographic analysis was  
523 that all models with two rates of migration (2 $m$  models) fit the data better than those where  
524 migration was modelled at a single rate, indicating a heterogeneous pattern of gene flow across  
525 the genome. Moreover, the estimated parameters for the preferred model suggest that roughly  
526 one third of loci (37%) have experienced migration at substantially reduced rate compared with  
527 non-barrier loci. This result supports previous conclusions that candidate barrier traits and loci  
528 are indeed impacted by natural selection [24], further motivating the need to connect the  
529 phenotypic and genetic architecture of RI in more detail.

530

### 531 *From the 'bottom up': insights from the cline-based genome scan*

532 Starting with the bottom-up approach, we used a cline-based genome scan to identify  
533 candidate loci underlying barriers to gene flow. Unlike traditional summary statistics calculated  
534 between pre-defined groups (e.g.,  $F_{ST}$ ), geographic cline analysis is a more natural framework for  
535 studying genetic divergence across hybrid zones, as it provides clearer insights into the strength  
536 and nature of selection [24, 26]. Rather than fitting clines to allele frequencies for individuals  
537 SNPs, we fit clines to model-based ancestry scores, treating them as a quantitative trait [21].

538 By conducting this analysis at different scales of genomic organization, we are able to  
539 conclude that candidate barrier regions are widespread throughout the genome. At the genome-  
540 wide scale, the cline in ancestry is centered on the hybrid zone and has a very similar shape to  
541 the clines in floral traits. At the chromosome scale, all 10 chromosomes show clear sigmoid  
542 clines in ancestry, with their shapes and positions being highly similar to the genome-wide cline.  
543 The same conclusion can be drawn from the window-based analysis, as candidate barrier regions  
544 are present on all 10 of the chromosomes. The window with the highest  $cs$  score is located on  
545 chromosome 4 and contains the gene *MaMyb2*. Alternate alleles at this locus control the  
546 difference in flower color, and other population genetic analyses indicate that it has been subject  
547 to strong divergent selection in this system [35, 54]. Prior knowledge of this barrier locus  
548 provides confidence that other windows with high  $cs$  scores also likely harbor barrier loci with  
549 similarly large phenotypic effects.

550           However, rather than identifying a clear set of *cs* outliers, we observed a continuous  
551 distribution of *cs* scores, indicating that clines show varying degrees of resemblance to the  
552 genome-wide cline. Although it is tempting to interpret variation in the cline similarity score  
553 exclusively in terms of the sieving effect of a porous species boundary (i.e., assuming that the *cs*  
554 score is proportional to a local reduction in gene flow caused by associated barrier loci), the  
555 observed variation in *cs* scores requires more conservative interpretation. First, neutral processes,  
556 such as isolation-by-distance, can generate clines that are highly similar to clines generated by  
557 selection [26]. Similarly, neutral clines generated by secondary contact can take a long time to  
558 decay, making them hard to distinguish from selected ones [22, 51]. Localized drift (and  
559 sampling effects) tends to distort cline shapes in a way that may lead to the discovery of false  
560 positives [55, 56]. In addition, even though a genomic region may contain a large-effect barrier  
561 locus, it might not show a cline if the genomic window is too broad to capture the relevant  
562 signatures. Future efforts to help identify non-neutral clines may be accomplished using whole-  
563 genome rather than reduced-representation sequencing, and by comparing results obtained from  
564 multiple hybrid zones [27]. Simulations of cline formation could also help distinguish candidate  
565 outliers (as in [26]). Even with these measures in place, the noise generated by background  
566 processes and sampling effects may mean that we only have power to confidently detect large-  
567 effect loci, which remains a general problem with all genome scan approaches [3].

568

569 *From the ‘top down’: insights from QTL analysis of candidate isolating traits*

570           We mapped QTL to identify genomic regions underlying floral trait divergence in this  
571 system. Although we identified a small number of QTL for each trait (between 1 and 4), the  
572 identified QTL explained only about 20% of the variation in each trait. Given that these traits are  
573 under strong genetic control, the ‘missing’ variance implies that most of the floral traits are  
574 polygenic, caused by many loci with effect sizes below our limit of detection. However, some  
575 fraction of the unexplained variation also may be due to subtle environmental differences  
576 experienced by each plant in the greenhouse.

577           Although finding many small-effect loci may be expected in studies of phenotypic  
578 evolution [57], many analyses of adaptation and speciation have recovered distributions of effect  
579 sizes skewed toward larger effects [58, 59]. Moreover, the identified regions often control more  
580 than one trait, and in some cases, more than one type of isolating barrier (e.g., pre- and post-  
581 mating barriers). For example, in another pair of *Mimulus* species, *M. cardinalis* and *M. lewisii*,  
582 large-effect QTL for multiple traits associated with pollinator isolation and hybrid sterility occur  
583 in a few genomic regions thought to harbor chromosomal inversions [4, 60]. In sunflowers  
584 (*Helianthus*), multiple traits are associated with local adaptation to dune and non-dune habitats  
585 and map to a small number of large, non-recombining haplotypes containing structural variants  
586 [61] (see [62-64] for other examples).

587           Large, multiple effect loci are an expected outcome of local adaptation and speciation  
588 [17, 65], because more ‘concentrated’ genetic architectures are favored in scenarios where gene  
589 flow opposes adaptive divergence [65]. Not only do large effect loci make individual traits more

590 visible to selection, but tight linkage and pleiotropy enhance the coupling of different sets of  
591 adaptive traits, meaning that they can remain associated despite gene flow [17]. This begs the  
592 question: why do we see so few large effect loci and such little overlap among floral trait QTL in  
593 the red and yellow ecotypes? One potential explanation is that divergence was initiated during a  
594 period of geographic isolation—a hypothesis that is supported by our demographic analysis. If  
595 trait divergence did occur during a phase of allopatry, the selection favoring certain combinations  
596 of traits could build-up LD among many small-effect loci without opposition by gene flow.  
597 Although the associations would decay rapidly upon secondary contact (as we see in the hybrid  
598 zone; [24, 33]), this decay would be expected to occur over a spatial scale determined by the  
599 strength of selection and the migration rate. If two adjacent habitats occur over a scale that is  
600 many times larger than the dispersal distance of the organism (as is the case between the red and  
601 yellow ecotypes; [33]), then hybridization has almost no bearing on adaptation occurring in  
602 distant parts of the range [66]. This makes divergence in parapatry almost as easy as in allopatry  
603 [67], meaning that local adaptation will persist far from the hybrid zone, and strong associations  
604 among small effect loci can remain in all regions except for those closest to the hybrid zone.

605 Another factor that may have influenced the outcome of our QTL analysis is that the  
606 parents we used for mapping came from populations located very far from hybrid zone. Because  
607 concentrated genetic architectures evolve as a response to gene flow, theory predicts that the  
608 genetic architecture of local adaptation may vary spatially in a way that reflects the local  
609 hybridization risk. This was highlighted in a hybrid zone between two ecologically differentiated  
610 subspecies of *Boechera stricta* [68]. In the vicinity of the hybrid zone, several phenological traits  
611 map to a single locus containing a chromosomal inversion, where the ecotypes are differentially  
612 fixed for the standard and inverted arrangements. However, in areas that are more distant to the  
613 hybrid zone, both ecotypes harbor the standard arrangement, and QTL mapping with these  
614 populations revealed distinct QTL. Although it is possible that the genetic architecture of  
615 divergence also varies across the range of the red and yellow ecotypes in a way that might favor  
616 divergence, our observations suggest that this is unlikely. Specifically, there is no evidence for  
617 the phenotypic maintenance of two distinct ecotypic forms within the hybrid zone. Instead, we  
618 see a continuum of phenotypic variation that resembles what we observe in the F<sub>2</sub> mapping  
619 population [33], suggesting a similarly complex genetic architecture across the range.

620

#### 621 *Inferences from integrating top-down and bottom up approaches*

622 Having identified a set of candidate barrier loci and QTL regions for putative barrier  
623 traits, we next sought to understand how they were connected in relation to previous hypotheses  
624 about reproductive isolation in this system [24]. Taken at face value, the two analyses seem  
625 consistent, as they both suggest that divergence in this system is polygenic, involving regions  
626 spread across the genome. However, when we intersect the regions identified by these  
627 approaches, we find very little concordance. What does this tell us about divergence in this  
628 system?



629 First, there are some technical and biological explanations that could account for these  
630 findings. The first is that QTL analysis often has low resolution. Specifically, the QTL intervals  
631 are very wide, substantially reducing our power to test if QTL regions are enriched for candidate  
632 barrier loci. We see the same result if we focus on the estimated location of the QTL peaks,  
633 which never fall inside a candidate barrier region. This is even true for the peak of the large-  
634 effect QTL for floral anthocyanin pigmentation that is located 589 kb from the window with the  
635 highest *cs* score and contains the *MaMyb2* gene, which we know is responsible for the major  
636 difference in flower color [35]. Therefore, had we not had *a priori* knowledge about the position  
637 of the gene from previous work, it is likely we would have failed to connect this strong signal of  
638 selection with the underlying gene involved. In addition, our genome scan is based on RADseq  
639 data, so the SNP density may have been too sparse to obtain sequences in LD with the loci under  
640 selection. Moreover, from a biological perspective, the QTL analysis implies that most of the  
641 traits studied are polygenic, meaning that selection on each locus is weak, making it difficult to  
642 detect them using any genome scan. All of these factors probably contribute to the highly  
643 complex pattern that we see.

644 Similarly, although many of the candidate barrier loci have clines that resemble the  
645 window that contains the large effect locus *MaMyb2*, these windows are not associated with  
646 large-effect QTL for floral traits. One possible explanation for this is that we may have failed to  
647 measure the relevant floral traits contributing to pollinator isolation. This seems unlikely, given  
648 how well floral morphology has been studied in this system [29, 31-33]. We therefore  
649 hypothesize that other barriers to gene flow, besides pollinator isolation, play an important role  
650 in the maintenance of this hybrid zone. For example, local adaptation of non-floral traits could be  
651 an important source of pre- and post-mating isolation [13, 69]. We previously identified clines in  
652 several eco-physiological traits that may be associated with habitat-based isolation [70], but  
653 these show very shallow linear gradients rather than sharp sigmoid clines, and they are well  
654 explained by variation in local climate variables, making them unlikely candidates [70].  
655 However, other ecologically-based barriers may exist that remain to be characterized. Finally, it  
656 is possible that some of the candidate barrier regions contain intrinsic incompatibilities that cause  
657 reduced fitness in hybrids [71]. Although our previous work found little evidence for intrinsic  
658 postzygotic isolation in the  $F_1$  generation, we did detect partial male sterility in some inter-  
659 ecotype crosses [36]. In addition, we have only surveyed plants under benign greenhouse  
660 conditions and only through the  $F_1$  generation. Genetic incompatibilities in later generations [72]  
661 or under natural conditions [73] might play a larger role in the maintenance of the ecotypes than  
662 anticipated—a prediction that has been made in relation to ‘ecological speciation’ more broadly  
663 [15].

#### 664 *Conclusions and implications for studying the architecture of speciation*

665 By combining top-down and bottom-up approaches with demographic modelling, our  
666 study provides new insight into the history and genetic architecture of speciation between these  
667 monkeyflower ecotypes. Our demographic analysis suggests that the hybrid zone formed by  
668

669 secondary contact, but gene flow following contact is now heterogeneous across the genome due  
670 to the effect of multiple barrier loci. A cline-based genome scan indicates that candidate barrier  
671 loci are widespread across the genome, rather than being associated with one or a few ‘islands’  
672 of speciation. A QTL analysis of floral traits identified many QTL of small effect, with limited  
673 co-localization among QTL for different traits. We found limited evidence that QTL and  
674 candidate barrier loci overlap, suggesting that other barriers to gene flow aside from pollinator  
675 isolation may contribute to speciation.

676 In addition to providing knowledge about this system, our study has important  
677 implications for efforts to understand the phenotypic and genetic architecture of isolating  
678 barriers. For many study systems, candidate barrier traits and loci are identified in separate  
679 studies, meaning that the link between them is not tested explicitly. However, any barrier locus  
680 associated with an ecological gradient may underlie a completely different type of barrier. This  
681 was highlighted by [15], who showed how intrinsic barriers can become spatially coupled with  
682 ecologically-based barriers—a phenomenon that may cause researchers to erroneously identify  
683 incompatibility loci as those underlying local adaptation. The same issue also arises if multiple  
684 ecological gradients change in concert. We therefore advocate for additional studies that  
685 integrate top-down and bottom-up approaches before drawing conclusions about causal  
686 associations between candidate barrier traits and loci. Finally, our study shows that, even with a  
687 concerted effort, understanding the phenotypic and genetic basis of speciation is extremely  
688 difficult. Although emerging methods and data may help, this will likely remain a major  
689 challenge for the field.

690

#### 691 **Data availability**

692 Sequence data are available on the short read archive (SRA) under bio projects PRJNA299226  
693 and PRJNA317601. All other datafiles are available on dryad. Scripts for performing custom  
694 analyses are available at [https://github.com/seanstankowski/Mimulus\\_cline\\_QTL\\_manuscript](https://github.com/seanstankowski/Mimulus_cline_QTL_manuscript).

695

#### 696 **Acknowledgments**

697 We thank Julian Catchen for making modifications to *Stacks* to aid this project. Peter L. Ralph,  
698 Thomas Nelson and Roger K. Butlin and Anja M. Westram and Nicholas H. Barton provided  
699 advice, stimulating discussion, and critical feedback. The project was supported by National  
700 Science Foundation grant DEB-1258199.

701

#### 702 **Author contributions**

703 SS and MAS designed the study and conducted the molecular work. SS and HM performed the  
704 QTL analysis. SS, MAC, and MAS conducted all other analyses. SS and MAS wrote the  
705 manuscript, with input from the other authors. Scripts for performing custom analyses are  
706 available at [https://github.com/seanstankowski/Mimulus\\_cline\\_QTL\\_manuscript](https://github.com/seanstankowski/Mimulus_cline_QTL_manuscript).

707

#### 708 **Competing interests**

709 The authors declare no competing financial interests

710

## 711 **References**

- 712 1. Nosil P. *Ecological Speciation*: Oxford University Press; 2012.
- 713 2. Seehausen O, Butlin RK, Keller I, Wagner CE, Boughman JW, Hohenlohe PA, et al.  
714 Genomics and the origin of species. *Nat Rev Genet.* 2014;15(3):176-92. doi: 10.1038/nrg3644.  
715 PubMed PMID: ISI:000331895300010.
- 716 3. Ravinet M, Faria R, Butlin RK, Galindo J, Bierne N, Rafajlovic M, et al. Interpreting the  
717 genomic landscape of speciation: a road map for finding barriers to gene flow. *J Evolution Biol.*  
718 2017;30(8):1450-77. doi: 10.1111/jeb.13047. PubMed PMID: ISI:000407280900001.
- 719 4. Schemske DW, Bradshaw HD. Pollinator preference and the evolution of floral traits in  
720 monkeyflowers (*Mimulus*). *P Natl Acad Sci USA.* 1999;96(21):11910-5. doi: DOI  
721 10.1073/pnas.96.21.11910. PubMed PMID: ISI:000083166800043.
- 722 5. Fishman L, Willis JH. Evidence for Dobzhansky-Muller incompatibilities contributing to  
723 the sterility of hybrids between *Mimulus guttatus* and *M-nasutus*. *Evolution.* 2001;55(10):1932-  
724 42. PubMed PMID: ISI:000172308600003.
- 725 6. Orr HA. The genetics of species differences. *Trends Ecol Evol.* 2001;16(7):343-50.  
726 PubMed PMID: ISI:000169461000004.
- 727 7. Lamichhaney S, Berglund J, Almen MS, Maqbool K, Grabherr M, Martinez-Barrio A, et al.  
728 Evolution of Darwin's finches and their beaks revealed by genome sequencing. *Nature.*  
729 2015;518(7539):371-5. Epub 2015/02/18. doi: 10.1038/nature14181. PubMed PMID: 25686609.
- 730 8. Turner TL, Hahn MW, Nuzhdin SV. Genomic islands of speciation in *Anopheles*  
731 *gambiae*. *Plos Biol.* 2005;3(9):1572-8. doi: ARTN e285  
732 10.1371/journal.pbio.0030285. PubMed PMID: ISI:000231820900008.
- 733 9. Martin SH, Dasmahapatra KK, Nadeau NJ, Salazar C, Walters JR, Simpson F, et al.  
734 Genome-wide evidence for speciation with gene flow in *Heliconius* butterflies. *Genome Res.*  
735 2013;23(11):1817-28. doi: 10.1101/gr.159426.113. PubMed PMID: ISI:000326642500006.
- 736 10. Soria-Carrasco V, Gompert Z, Comeault AA, Farkas TE, Parchman TL, Johnston JS, et al.  
737 Stick Insect Genomes Reveal Natural Selection's Role in Parallel Speciation. *Science.*  
738 2014;344(6185):738-42. doi: 10.1126/science.1252136. PubMed PMID: ISI:000335912900039.
- 739 11. Barrett RDH, Hoekstra HE. Molecular spandrels: tests of adaptation at the genetic level  
740 (vol 12, pg 767, 2011). *Nat Rev Genet.* 2012;13(1):70-. doi: 10.1038/nrg3138. PubMed PMID:  
741 ISI:000298327300014.
- 742 12. Cruickshank TE, Hahn MW. Reanalysis suggests that genomic islands of speciation are  
743 due to reduced diversity, not reduced gene flow. *Molecular ecology.* 2014;23(13):3133-57. Epub  
744 2014/05/23. doi: 10.1111/mec.12796. PubMed PMID: 24845075.
- 745 13. Coyne JA, Orr HA. *Speciation*. Sunderland, MA: Sinauer Associates; 2004.
- 746 14. Stankowski S, Ravinet M. Defining the speciation continuum. *Evolution.*  
747 2021;75(6):1256-73. doi: 10.1111/evo.14215. PubMed PMID: ISI:000647226400001.
- 748 15. Bierne N, Welch J, Loire E, Bonhomme F, David P. The coupling hypothesis: why  
749 genome scans may fail to map local adaptation genes. *Molecular ecology.* 2011;20(10):2044-72.  
750 doi: 10.1111/j.1365-294X.2011.05080.x. PubMed PMID: ISI:000290168900004.
- 751 16. Butlin RK, Smadja CM. Coupling, Reinforcement, and Speciation. *Am Nat.*  
752 2018;191(2):155-72. doi: 10.1086/695136. PubMed PMID: ISI:000422944300003.

- 753 17. Smadja CM, Butlin RK. A framework for comparing processes of speciation in the  
754 presence of gene flow. *Molecular ecology*. 2011;20(24):5123-40. doi: 10.1111/j.1365-  
755 294X.2011.05350.x. PubMed PMID: ISI:000298089300004.
- 756 18. Faria R, Johannesson K, Stankowski S. Speciation in marine environments: Diving under  
757 the surface. *J Evolution Biol*. 2021;34(1):4-15. doi: 10.1111/jeb.13756. PubMed PMID:  
758 ISI:000608367500001.
- 759 19. Abbott R, Albach D, Ansell S, Arntzen JW, Baird SJE, Bierne N, et al. Hybridization and  
760 speciation. *J Evolution Biol*. 2013;26(2):229-46. doi: 10.1111/j.1420-9101.2012.02599.x.  
761 PubMed PMID: ISI:000313747600001.
- 762 20. Harrison RG. Hybrid zones: windows on evolutionary process. *Oxford Surveys in*  
763 *Evolutionary Biology*. 1990;7:69-128.
- 764 21. Barton NH, Gale KS. Genetic analysis of hybrid zones. *Hybrid Zones and Evolutionary*  
765 *Process*1993. p. 13-45.
- 766 22. Barton NH, Hewitt GM. Analysis of Hybrid Zones. *Annu Rev Ecol Syst*. 1985;16:113-  
767 48. doi: DOI 10.1146/annurev.es.16.110185.000553. PubMed PMID: ISI:A1985AUL3900006.
- 768 23. Szymura JM, Barton NH. Genetic-Analysis of a Hybrid Zone between the Fire-Bellied  
769 Toads, *Bombina-Bombina* and *Bombina-Variegata*, near Cracow in Southern Poland. *Evolution*.  
770 1986;40(6):1141-59. doi: Doi 10.2307/2408943. PubMed PMID: ISI:A1986F052900004.
- 771 24. Stankowski S, Sobel JM, Streisfeld MA. Geographic cline analysis as a tool for studying  
772 genome-wide variation: a case study of pollinator-mediated divergence in a monkeyflower.  
773 *Molecular ecology*. 2017;26(1):107-22. doi: 10.1111/mec.13645. PubMed PMID:  
774 ISI:000391940600008.
- 775 25. Singhal S, Bi K. History cleans up messes: The impact of time in driving divergence and  
776 introgression in a tropical suture zone. *Evolution*. 2017;71(7):1888-99. doi: 10.1111/evo.13278.  
777 PubMed PMID: ISI:000405888100013.
- 778 26. Westram AM, Rafajlovic M, Chaube P, Faria R, Larsson T, Panova M, et al. Clines on  
779 the seashore: The genomic architecture underlying rapid divergence in the face of gene flow.  
780 *Evol Lett*. 2018;2(4):297-309. doi: 10.1002/evl3.74. PubMed PMID: ISI:000446774400004.
- 781 27. Westram AM, Faria R, Johannesson K, Butlin R. Using replicate hybrid zones to  
782 understand the genomic basis of adaptive divergence. *Molecular ecology*. 2021;30(15):3797-814.  
783 doi: 10.1111/mec.15861. PubMed PMID: ISI:000669439700001.
- 784 28. Rafati N, Blanco-Aguiar JA, Rubin CJ, Sayyab S, Sabatino SJ, Afonso S, et al. A  
785 genomic map of clinal variation across the European rabbit hybrid zone. *Molecular ecology*.  
786 2018;27(6):1457-78. doi: 10.1111/mec.14494. PubMed PMID: ISI:000430183100010.
- 787 29. Streisfeld MA, Kohn JR. Contrasting patterns of floral and molecular variation across a  
788 cline in *Mimulus aurantiacus*. *Evolution*. 2005;59(12):2548-59. PubMed PMID:  
789 ISI:000234502400006.
- 790 30. Stankowski S, Chase MA, Fuiten AM, Rodrigues MF, Ralph PL, Streisfeld MA.  
791 Widespread selection and gene flow shape the genomic landscape during a radiation of  
792 monkeyflowers. *Plos Biol*. 2019;17(7). doi: ARTN e3000391  
793 10.1371/journal.pbio.3000391. PubMed PMID: ISI:000478922100030.
- 794 31. Waayers GM. Hybridization, introgression, and selection in *Mimulus aurantiacus* ssp.  
795 *australis* and *Mimulus puniceus*. San Diego, CA: San Diego State University; 1996.
- 796 32. Tulig M. Morphological variation in *Mimulus* section *Diplacus* (*Scrophulariaceae*).  
797 Pomona, CA: California Polytechnic University; 2000.

- 798 33. Stankowski S, Sobel JM, Streisfeld MA. The geography of divergence with gene flow  
799 facilitates multitrait adaptation and the evolution of pollinator isolation in *Mimulus aurantiacus*.  
800 *Evolution*. 2015;69(12):3054-68. doi: 10.1111/evo.12807. PubMed PMID:  
801 ISI:000368249000003.
- 802 34. Streisfeld MA, Kohn JR. Environment and pollinator-mediated selection on parapatric  
803 floral races of *Mimulus aurantiacus*. *J Evolution Biol*. 2007;20(1):122-32. doi: 10.1111/j.1420-  
804 9101.2006.01216.x. PubMed PMID: ISI:000242904600020.
- 805 35. Streisfeld MA, Young WN, Sobel JM. Divergent Selection Drives Genetic  
806 Differentiation in an R2R3-MYB Transcription Factor That Contributes to Incipient Speciation  
807 in *Mimulus aurantiacus*. *Plos Genet*. 2013;9(3). doi: ARTN e1003385  
808 10.1371/journal.pgen.1003385. PubMed PMID: ISI:000316866700058.
- 809 36. Sobel JM, Streisfeld MA. Strong premating reproductive isolation drives incipient  
810 speciation in *Mimulus aurantiacus*. *Evolution*. 2015;69(2):447-61. doi: 10.1111/evo.12589.  
811 PubMed PMID: ISI:000348916200013.
- 812 37. Catchen J, Hohenlohe PA, Bassham S, Amores A, Cresko WA. Stacks: an analysis tool  
813 set for population genomics. *Molecular ecology*. 2013;22(11):3124-40. Epub 2013/05/25. doi:  
814 10.1111/mec.12354. PubMed PMID: 23701397; PubMed Central PMCID: PMC3936987.
- 815 38. Langmead B, Salzberg SL. Fast gapped-read alignment with Bowtie 2. *Nat Methods*.  
816 2012;9(4):357-U54. doi: 10.1038/Nmeth.1923. PubMed PMID: ISI:000302218500017.
- 817 39. Hohenlohe PA, Bassham S, Etter PD, Stiffler N, Johnson EA, Cresko WA. Population  
818 Genomics of Parallel Adaptation in Threespine Stickleback using Sequenced RAD Tags. *Plos*  
819 *Genet*. 2010;6(2). doi: ARTN e1000862  
820 10.1371/journal.pgen.1000862. PubMed PMID: ISI:000275262700012.
- 821 40. Gutenkunst RN, Hernandez RD, Williamson SH, Bustamante CD. Inferring the Joint  
822 Demographic History of Multiple Populations from Multidimensional SNP Frequency Data. *Plos*  
823 *Genet*. 2009;5(10). doi: ARTN e1000695  
824 10.1371/journal.pgen.1000695. PubMed PMID: ISI:000272032100033.
- 825 41. Chase MA, Stankowski S, Streisfeld MA. Genomewide variation provides insight into  
826 evolutionary relationships in a monkeyflower species complex (*Mimulus* sect. *Diplacus*). *Am J*  
827 *Bot*. 2017;104(10):1510-21. doi: 10.3732/ajb.1700234. PubMed PMID: ISI:000413976200014.
- 828 42. Rougeux C, Bernatchez L, Gagnaire PA. Modeling the Multiple Facets of Speciation-  
829 with-Gene-Flow toward Inferring the Divergence History of Lake Whitefish Species Pairs  
830 (*Coregonus clupeaformis*). *Genome Biol Evol*. 2017;9(8):2057-74. doi: 10.1093/gbe/evx150.  
831 PubMed PMID: ISI:000410677300007.
- 832 43. Ossowski S, Schneeberger K, Lucas-Lledo JI, Warthmann N, Clark RM, Shaw RG, et al.  
833 The Rate and Molecular Spectrum of Spontaneous Mutations in *Arabidopsis thaliana*. *Science*.  
834 2010;327(5961):92-4. doi: 10.1126/science.1180677. PubMed PMID: ISI:000273395400038.
- 835 44. Alexander DH, Novembre J, Lange K. Fast model-based estimation of ancestry in  
836 unrelated individuals. *Genome Res*. 2009;19(9):1655-64. doi: 10.1101/gr.094052.109. PubMed  
837 PMID: ISI:000269482200017.
- 838 45. Purcell S, Neale B, Todd-Brown K, Thomas L, Ferreira MAR, Bender D, et al. PLINK:  
839 A tool set for whole-genome association and population-based linkage analyses. *Am J Hum*  
840 *Genet*. 2007;81(3):559-75. doi: 10.1086/519795. PubMed PMID: ISI:000249128200012.
- 841 46. Derryberry EP, Derryberry GE, Maley JM, Brumfield RT. hzar: hybrid zone analysis  
842 using an R software package. *Mol Ecol Resour*. 2014;14(3):652-63. doi: 10.1111/1755-  
843 0998.12209. PubMed PMID: ISI:000334240000022.

- 844 47. Excoffier L, Lischer HEL. Arlequin suite ver 3.5: a new series of programs to perform  
845 population genetics analyses under Linux and Windows. *Mol Ecol Resour.* 2010;10(3):564-7.  
846 doi: 10.1111/j.1755-0998.2010.02847.x. PubMed PMID: ISI:000276407300020.
- 847 48. Broman KW, Wu H, Sen S, Churchill GA. R/qtl: QTL mapping in experimental crosses.  
848 *Bioinformatics.* 2003;19(7):889-90. doi: 10.1093/bioinformatics/btg112. PubMed PMID:  
849 ISI:000182634800014.
- 850 49. Rastas P, Calboli FCF, Guo BC, Shikano T, Merila J. Construction of Ultradense Linkage  
851 Maps with Lep-MAP2: Stickleback F-2 Recombinant Crosses as an Example. *Genome Biol*  
852 *Evol.* 2016;8(1):78-93. doi: 10.1093/gbe/evv250. PubMed PMID: ISI:000370971600007.
- 853 50. Lawrence M, Huber W, Pages H, Aboyoun P, Carlson M, Gentleman R, et al. Software  
854 for Computing and Annotating Genomic Ranges. *Plos Comput Biol.* 2013;9(8). doi: ARTN  
855 e1003118  
856 10.1371/journal.pcbi.1003118. PubMed PMID: ISI:000323885400001.
- 857 51. Endler JA. *Geographic Variation, Speciation, and Clines*: Princeton University Press;  
858 1977.
- 859 52. Hewitt GM. Hybrid Zones - Natural Laboratories for Evolutionary Studies. *Trends Ecol*  
860 *Evol.* 1988;3(7):158-67. doi: Doi 10.1016/0169-5347(88)90033-X. PubMed PMID:  
861 ISI:A1988N945300004.
- 862 53. Momigliano P, Florin AB, Merila J. Biases in Demographic Modeling Affect Our  
863 Understanding of Recent Divergence. *Mol Biol Evol.* 2021;38(7):2967-85. doi:  
864 10.1093/molbev/msab047. PubMed PMID: ISI:000671060500022.
- 865 54. Stankowski S, Streisfeld MA. Introgressive hybridization facilitates adaptive divergence  
866 in a recent radiation of monkeyflowers. *P Roy Soc B-Biol Sci.* 2015;282(1814):154-62. doi: Artn  
867 20151666  
868 10.1098/Rspb.2015.1666. PubMed PMID: ISI:000363361800019.
- 869 55. Polechova J, Barton N. Genetic Drift Widens the Expected Cline but Narrows the  
870 Expected Cline Width. *Genetics.* 2011;189(1):227-U905. doi: 10.1534/genetics.111.129817.  
871 PubMed PMID: ISI:000294721600018.
- 872 56. Jofre GI, Rosenthal GG. A narrow window for geographic cline analysis using genomic  
873 data: Effects of age, drift, and migration on error rates. *Mol Ecol Resour.* 2021;21(7):2278-87.  
874 doi: 10.1111/1755-0998.13428. PubMed PMID: ISI:000656092200001.
- 875 57. Rockman MV. The Qtn Program and the Alleles That Matter for Evolution: All That's  
876 Gold Does Not Glitter. *Evolution.* 2012;66(1):1-17. doi: 10.1111/j.1558-5646.2011.01486.x.  
877 PubMed PMID: ISI:000298739100001.
- 878 58. Griswold CK. Gene flow's effect on the genetic architecture of a local adaptation and its  
879 consequences for QTL analyses. *Heredity.* 2006;96(6):445-53. doi: 10.1038/sj.hdy.6800822.  
880 PubMed PMID: ISI:000237751700006.
- 881 59. Lenormand T. Gene flow and the limits to natural selection. *Trends Ecol Evol.*  
882 2002;17(4):183-9. doi: Doi 10.1016/S0169-5347(02)02497-7. PubMed PMID:  
883 ISI:000174446400011.
- 884 60. Fishman L, Stathos A, Beardsley PM, Williams CF, Hill JP. Chromosomal  
885 Rearrangements and the Genetics of Reproductive Barriers in *Mimulus* (Monkey Flowers).  
886 *Evolution.* 2013;67(9):2547-60. doi: 10.1111/evo.12154. PubMed PMID: ISI:000323828500007.
- 887 61. Todesco M, Owens GL, Bercovich N, Legare JS, Soudi S, Burge DO, et al. Massive  
888 haplotypes underlie ecotypic differentiation in sunflowers. *Nature.* 2020;584(7822):602-+. doi:  
889 10.1038/s41586-020-2467-6. PubMed PMID: ISI:000546555800006.

- 890 62. Lowry DB, Willis JH. A Widespread Chromosomal Inversion Polymorphism Contributes  
891 to a Major Life-History Transition, Local Adaptation, and Reproductive Isolation. *Plos Biol.*  
892 2010;8(9). doi: ARTN e1000500  
893 10.1371/journal.pbio.1000500. PubMed PMID: ISI:000282279200019.
- 894 63. Jones FC, Grabherr MG, Chan YF, Russell P, Mauceli E, Johnson J, et al. The genomic  
895 basis of adaptive evolution in threespine sticklebacks. *Nature.* 2012;484(7392):55-61. doi:  
896 10.1038/nature10944. PubMed PMID: ISI:000302343400033.
- 897 64. Hager ER, Harringmeyer OS, Wooldridge TB, Theingi S, Gable JT, McFadden S, et al. A  
898 chromosomal inversion drives evolution of multiple adaptive traits in deer mice. *bioRxiv.* 2021.  
899 doi: <https://doi.org/10.1101/2021.01.21.427490>.
- 900 65. Yeaman S, Whitlock MC. The Genetic Architecture of Adaptation under Migration-  
901 Selection Balance. *Evolution.* 2011;65(7):1897-911. doi: 10.1111/j.1558-5646.2011.01269.x.  
902 PubMed PMID: ISI:000292447000006.
- 903 66. Barton NH. What role does natural selection play in speciation? *Philos T R Soc B.*  
904 2010;365(1547):1825-40. doi: 10.1098/rstb.2010.0001. PubMed PMID: ISI:000277208600009.
- 905 67. Barton NH. Does hybridization influence speciation? *J Evolution Biol.* 2013;26(2):267-9.  
906 doi: 10.1111/jeb.12015. PubMed PMID: ISI:000313747600007.
- 907 68. Lee CR, Wang BS, Mojica JP, Mandakova T, Prasad KYSK, Goicoechea JL, et al.  
908 Young inversion with multiple linked QTLs under selection in a hybrid zone. *Nat Ecol Evol.*  
909 2017;1(5). doi: ArtN 0119  
910 10.1038/S41559-017-0119. PubMed PMID: ISI:000417173100009.
- 911 69. Sobel JM, Chen GF, Watt LR, Schemske DW. The Biology of Speciation. *Evolution.*  
912 2010;64(2):295-315. doi: 10.1111/j.1558-5646.2009.00877.x. PubMed PMID:  
913 ISI:000273821700001.
- 914 70. Sobel JM, Stankowski S, Streisfeld MA. Variation in ecophysiological traits might  
915 contribute to ecogeographic isolation and divergence between parapatric ecotypes of *Mimulus*  
916 *aurantiacus*. *J Evolution Biol.* 2019;32(6):604-18. doi: 10.1111/jeb.13442. PubMed PMID:  
917 ISI:000472662300008.
- 918 71. Kulmuni J, Westram AM. Intrinsic incompatibilities evolving as a by-product of  
919 divergent ecological selection: Considering them in empirical studies on divergence with gene  
920 flow. *Molecular ecology.* 2017;26(12):3093-103. doi: 10.1111/mec.14147. PubMed PMID:  
921 ISI:000402836700003.
- 922 72. Stelkens RB, Schmid C, Seehausen O. Hybrid Breakdown in Cichlid Fish. *Plos One.*  
923 2015;10(5). doi: ARTN e0127207  
924 10.1371/journal.pone.0127207. PubMed PMID: ISI:0003564444000050.
- 925 73. Thompson K, Peichel CH, Rennison DK, McGee MR, Albert AYK, Vines T, et al.  
926 Analysis of ancestry heterozygosity suggests that hybrid incompatibilities in threespine  
927 stickleback are environment dependent. *Plos Biol.* 2022;20(1). doi: ARTN e3001469  
928 10.1371/journal.pbio.3001469. PubMed PMID: ISI:000740930300001.
- 929 74. Streisfeld MA, Rausher MD. Altered trans-Regulatory Control of Gene Expression in  
930 Multiple Anthocyanin Genes Contributes to Adaptive Flower Color Evolution in *Mimulus*  
931 *aurantiacus*. *Mol Biol Evol.* 2009;26(2):433-44. doi: 10.1093/molbev/msn268. PubMed PMID:  
932 ISI:000262525700018.
- 933  
934  
935

936 **Supplementary tables and figure captions**

937 **Table S1. Location information and samples sizes for the sample sites used in the study.**

938 Population codes correspond with those in Figure 1.

939

940 **Table S2. Estimated parameters from each demographic model.**  $N_a$ , size of the ancestral  
941 population;  $N_r$ , size of the red population,  $N_y$ , size of the yellow population;  $T_s$ , duration of the  
942 split;  $m_{ry}$ , migration from yellow into red;  $m_{yr}$ , migration from red into yellow;  $T_{am}$ , duration of  
943 ancient migration;  $T_{SC}$ , duration of secondary contact.

944

945 **Figure S1. Cartoons of each model tested in the demographic analysis.** (i) SI, strict isolation;  
946 (ii) AM, ancient migration; (iii) IM, isolation with migration; (iv) SC, Secondary contact; (v)  
947 PSC, Periods of secondary contact. The remaining four models—AM2*m*, IM2*m*, SC2*m*,  
948 PSC2*m*—are the same as models *ii-v*, except that migration rates are inferred for two groups of  
949 loci to simulate the effect of a porous barrier to gene flow. The model parameters are as follows:  
950  $N_a$ , size of the ancestral population;  $N_r$ , size of the red population,  $N_y$ , size of the yellow  
951 population;  $T_s$ , duration of the split;  $m_{ry}$ , migration from yellow into red;  $m_{yr}$ , migration from red  
952 into yellow;  $m_{ery}$ , effective migration from yellow into red;  $m_{eyr}$ , effective migration from red into  
953 yellow;  $T_{am}$ , duration of ancient migration;  $T_{SC}$ , duration of secondary contact.

954

955 **Figure S2. Information on the size and content of the 100 SNP windows.** Distributions of  
956 window size (kb) and the number of RAD tags sequenced (post filtering) within each window.

957

958 **Figure S3. Floral traits measured for the QTL analysis.** In addition to the size-related traits,  
959 we also measured anthocyanin and carotenoid pigment levels. Anthocyanins were extracted in  
960 1% acidic methanol from a single disc collected from one of the top petals the first day each  
961 flower opened. Absorbance of extracts was measured with a spectrophotometer at 520 nm, as  
962 described previously [74]. Carotenoids were extracted in hexane following a similar protocol,  
963 and absorbance was measured at 450 nm.

964

965 **Figure S4. Fits of the different demographic models to the observed data.** The observed  
966 unfolded joint site-frequency spectrum (JSFS) calculated from the RADseq data set is shown on  
967 the left. The first column shows the modeled JSFS for the best fit of each model (See Fig. S1 for  
968 a cartoon of each model). The second column shows the residuals of the best model fit to the  
969 observed JSFS. The third column shows the residuals plotted as a histogram.

970

971 **Figure S5. The results of an *Admixture* analysis conducted on the full SNP dataset.** Each bar  
972 represents an individual and shows its probability of membership ( $Q$  score) to the two different  
973 clusters. Individuals are grouped by whether they come from the distribution of the red ecotype,  
974 yellow ecotype, or from within the hybrid zone.

975



976 **Figure S6. Cline fits for each chromosome.** Black points are the mean ancestry scores plotted  
977 along the one dimensional transect. The dashed line is the ML sigmoid model.

978

979 **Figure S7. Relationship between the cline similarity score (cs) and  $F_{CT}$ .** The line through the  
980 plot is the least squares regression ( $r^2 = 0.38$ ).

981

982 **Figure S8. Trait variation in greenhouse-raised red ecotype, yellow ecotype,  $F_1$ , and  $F_2$**   
983 **individuals.** The histogram in each plot shows the distribution for each trait in the  $F_2$  population.  
984 The top, middle and lower box plots show the distributions for the yellow ecotype, red ecotype  
985 and  $F_1$ , respectively.  $\Delta SD$  indicates the number of standard deviation that the red and yellow  
986 ecotypes differ by.

987

988 **Figure S9. LOD scores plotted across the genome for each trait in the QTL analysis.** The  
989 horizontal red line shows the LOD score cutoff for the detection of a significant QTL. Note the  
990 different y-axis scales among traits.

991

992 **Figure S10. QTL effect plots for each of the 26 QTL discovered in the analysis.** Each plot  
993 shows the mean (circle) and standard deviation (crosses) for each trait plotted against the three  
994 genotypes. RR, both alleles inherited from a red grandparent; YY, both alleles inherited from a  
995 yellow grandparent; RY, Heterozygous. Red lines indicate that the effect occurs in the opposite  
996 direction of that inferred by the trait differences measured in the red and yellow grandparents  
997 (see Fig. S8).

998

999 **Figure 11. Distribution of effect sizes (percent variation explained among  $F_2$  plants) for the**  
1000 **26 QTL detected in the study.**

1001

1002 **Figure S12. Results from the permutation test for the significant colocalization of QTL.** The  
1003 dashed red line shows the average number of observed overlaps per QTL, while the histogram  
1004 shows the observed null distribution, generated from 9,999 random permutations. The  $p$ -value  
1005 for the test is shown at the top of the plot.

1006

1007 **Figure S13. Correlation matrix showing the Pearson correlation between each pair of traits**  
1008 **in the  $F_2$  population.** The color and shape of each ellipse indicates the strength and direction of  
1009 each correlation.

1010

1011 **Figure S14. Results from the permutation tests for significant enrichment of candidate**  
1012 **barrier loci within the QTL Bayes credible intervals.** The test is performed with two different  
1013 arbitrary cutoffs for defining candidate barrier loci (top 1% and top 5% of the distribution) for  
1014 two different statistics (the cline similarity score and  $F_{CT}$ ). The red line shows the observed  
1015 number of candidate barrier loci falling within the QTL intervals, while the histogram shows the

1016 observed null distribution, generated from 9,999 random permutations. The  $p$ -value for the test is  
1017 shown at the top of the plot.

1018

1019 **Figure 1. Clinal variation across a bush monkeyflower hybrid zone. (top)** Typical flower  
1020 phenotypes of the red and yellow ecotypes, and a map of the 25 sampling locations in San Diego  
1021 County. The size of the circles shows variation in the sample sizes, which range from 4 to 18  
1022 individuals, totaling 292 individuals. The dashed line indicates the center of the hybrid zone,  
1023 previously inferred from spatial variation in the frequency of alternative alleles at the *MaMyb2*  
1024 locus. **(bottom)** Clines in allele frequency at the *MaMyb2* locus (red circles) and the mean floral  
1025 trait PC1 score (blue squares) across the one-dimensional transect. The solid and dashed lines are  
1026 the ML sigmoid cline models for *MaMyb2* allele frequency and trait PC1 score, respectively. The  
1027 gray shaded rectangle represents the width of the hybrid zone.

1028

1029 **Figure 2. Demographic modeling reveals a history of gene flow following isolation. (a) -**  
1030  $\Delta$ AIC scores for the 9 demographic models fitted to the observed JSFS using  $\partial a \partial i$ . The base  
1031 models (left of the dashed line) include a single migration parameter ( $m$ ) for all loci, whereas the  
1032  $2m$  models include separate migration parameters for neutral loci ( $m$ ) and loci affected by a  
1033 barrier to gene flow ( $m_e$ ). The best model (SC2 $m$ ) has a  $-\Delta$ AIC of 0, with more negative values  
1034 indicating that models were a poorer fit. **(b)** A graphical depiction of the SC2 $m$  model. The width  
1035 of the columns is proportional to the population size estimates for the ancestral ( $N_a$ ), red ( $N_R$ ),  
1036 and yellow ( $N_Y$ ) populations. the height of the red and yellow bars is proportional to the total  
1037 time in generations ( $T_S$ ) that has passed since the split. The blue bar shows the period during  
1038 which secondary gene flow ( $T_{SC}$ ) occurred. The difference in arrow size is proportional to the  
1039 difference in the bi-directional migration rate,  $m$ . The rates of effective migration ( $m_e$ ) are too  
1040 small to show graphically.

1041

1042 **Figure 3. Clines in ancestry scores at different scales of genomic organization. (a)** Genome-  
1043 wide cline, inferred from the mean ancestry scores in each population along the 1-D transect.  
1044 Position 0 on the horizontal axis corresponds to the cline center estimated from *MaMyb2* allele  
1045 frequencies (see Fig 1b). The vertical bars show the standard deviation in ancestry scores for  
1046 each population. The dashed line is the ML cline model, and the gray band is the two-unit  
1047 support envelope. Three parameters of interest, including the cline center ( $c$ ), width ( $w$ ), and total  
1048 change in ancestry across the cline ( $\Delta Q$ ), are indicated on the plot. **(b)** Ancestry clines estimated  
1049 separately for each chromosome. Only the ML curves are shown for clarity (but see Fig S6). The  
1050 dashed line is the mean cline, estimated by taking the average of the ML parameters for all  
1051 chromosomes. **(c)** Ancestry clines estimated for 2,173, 100-SNP windows. The dashed cyan line  
1052 shows the cline shape for the genome-wide cline (as shown in panel a), while the dashed orange  
1053 line is the mean cline shape, estimated by taking the average of the ML parameters obtained for  
1054 all windows. Each solid line is the ML sigmoid curve for one of the genomic windows. The  
1055 curves are colored according to the value of the cline similarity score ( $cs$ ), which indicates how

1056 similar the shape and position of each cline is to the genome-wide cline. Redder clines are more  
1057 similar to the genome-wide cline and bluer clines are less similar (See main text for more  
1058 details).

1059

1060 **Figure 4. Cline-based genome scan and locations of QTL for floral traits. (top)** The scaled  
1061 cline similarity (*cs* score) score in each 100 SNP window plotted against the physical position of  
1062 the window in the bush monkeyflower genome. The points are colored as in Figure 3c, with  
1063 redder points containing windows with *cs* scores that are more similar to the genome-wide  
1064 pattern and bluer points are less similar (See main text for more details). The orange asterisk  
1065 denotes the average barrier score among all windows. The position of the *MaMyb2* gene that  
1066 controls differences in flower color is shown. **(bottom)** The positions of the QTL for the 13  
1067 measured floral traits plotted along the physical position of the genome. The red vertical line  
1068 corresponds to the best estimate of the QTL peak, and the width of the rectangles denotes the  
1069 95% Bayes credible intervals of the estimated QTL position.

1070

**Table S1. Location information and samples sizes for the sample sites used in the study.**  
Population codes correspond with those in Figure 1.

| Pop name | Latitude  | Longitude   | 1-D distance (in meters) | <i>N</i> |
|----------|-----------|-------------|--------------------------|----------|
| CRS      | 33.13037  | -117.30717  | -26461                   | 11       |
| UCSD     | 32.8894   | -117.23618  | -25369                   | 12       |
| SDP      | 32.9981   | -117.23538  | -23857                   | 12       |
| MT       | 32.82095  | -117.06175  | -19135                   | 12       |
| JMC      | 32.73732  | -116.9541   | -13303                   | 18       |
| ELF      | 33.08595  | -117.1453   | -12893                   | 11       |
| LH       | 32.80582  | -116.9867   | -12730                   | 12       |
| FLP      | 32.89422  | -117.08982  | -12557                   | 12       |
| ELT      | 33.06088  | -117.11877  | -12168                   | 12       |
| PMD      | 32.93787  | -117.05913  | -8097                    | 12       |
| WM       | 32.82133  | -116.90228  | -4298                    | 17       |
| BS       | 33.0148   | -117.01643  | -3710                    | 18       |
| DLR      | 33.16818  | -117.05237  | -2153                    | 9        |
| MW       | 33.00718  | -116.95978  | -827                     | 17       |
| OAK      | 32.91407  | -116.88932  | -363                     | 12       |
| LKW      | 33.16372  | -117.0161   | 1177                     | 15       |
| DLZ      | 32.6525   | -116.78597  | 2891                     | 4        |
| WCR      | 32.9805   | -116.826517 | 8277                     | 12       |
| AND      | 32.868233 | -116.7461   | 9643                     | 4        |
| BC       | 33.12262  | -116.80468  | 10311                    | 13       |
| POTR     | 32.6038   | -116.63392  | 18064                    | 11       |
| INJ      | 33.09785  | -116.66432  | 22509                    | 11       |
| BCRD     | 32.94958  | -116.63795  | 22615                    | 6        |
| PCT      | 32.73258  | -116.46983  | 32097                    | 7        |
| LO       | 32.6767   | -116.33123  | 45224                    | 12       |

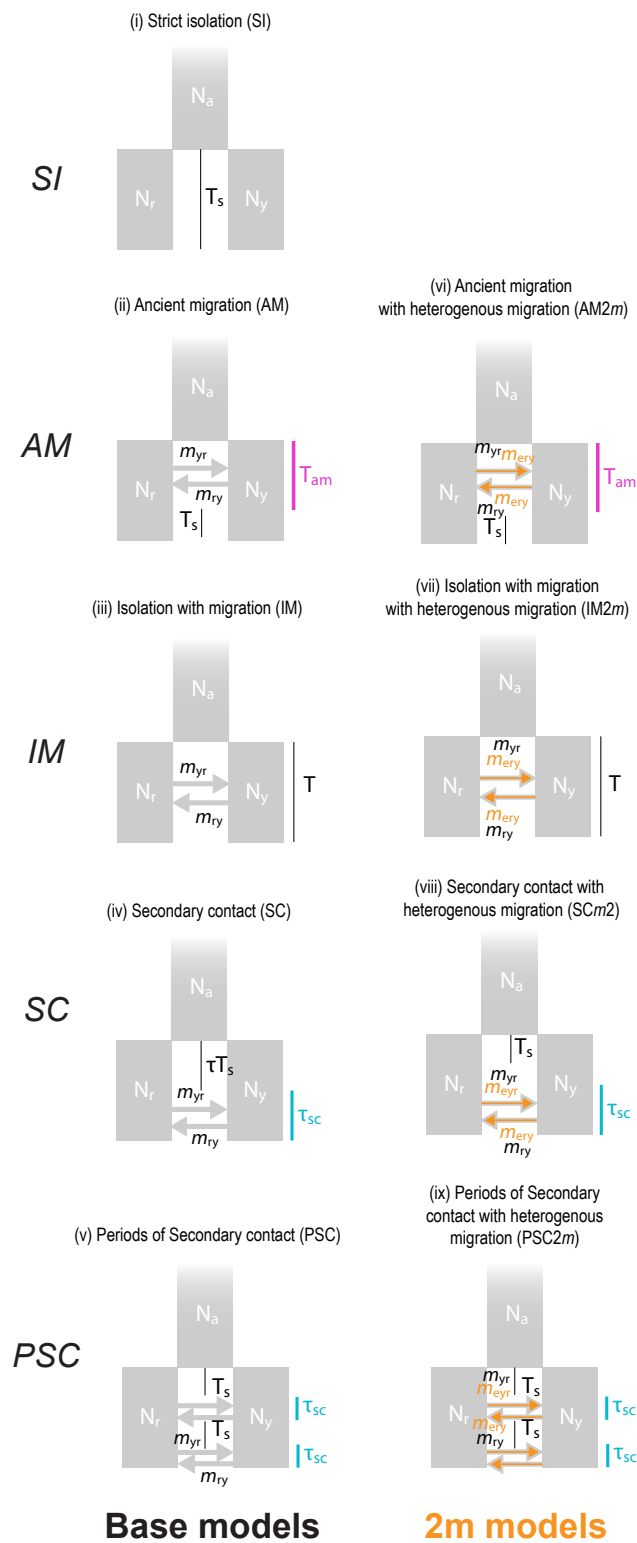

**Figure S1. Cartoons of each model tested in the demographic analysis.**

(i) SI, strict isolation; (ii) AM, ancient migration; (iii) IM, isolation with migration; (iv) SC, Secondary contact; (v) PSC, Periods of secondary contact. The remaining four models—AM2m, IM2m, SC2m, PSC2m—are the same as models *ii-v*, except that migration rates are inferred for two groups of loci to simulate the effect of a porous barrier to gene flow. The model parameters are as follows:  $N_a$ , size of the ancestral population;  $N_r$ , size of the red population,  $N_y$ , size of the yellow population;  $T_s$ , duration of the split;  $m_{yr}$ , migration from yellow into red;  $m_{ry}$ , migration from red into yellow;  $m_{ery}$ , effective migration from yellow into red;  $m_{eyr}$ , effective migration from red into yellow;  $T_{am}$ , duration of ancient migration;  $T_{sc}$ , duration of secondary contact.

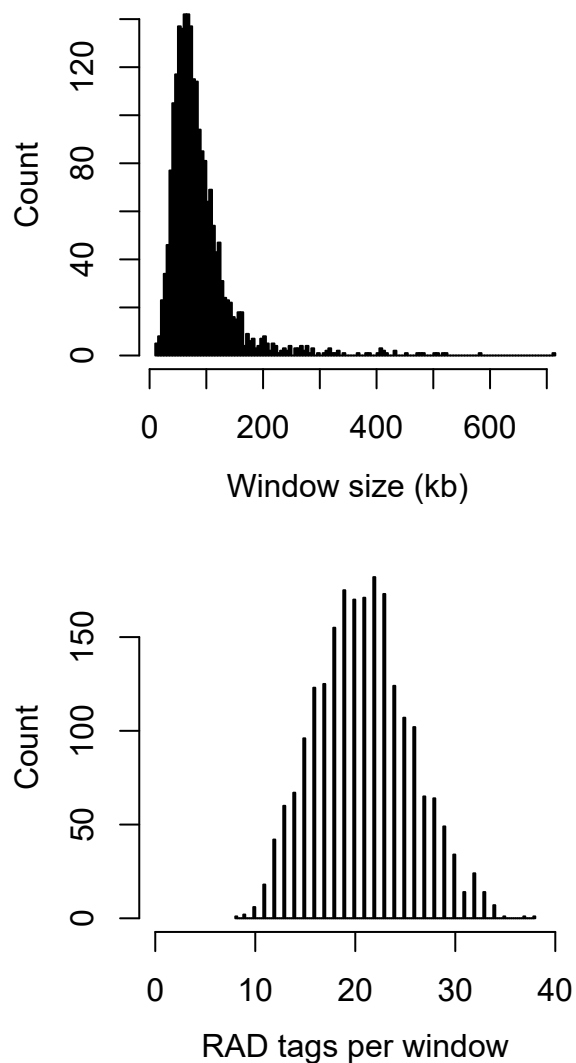

**Figure S2. Information on the size and content of the 100 SNP windows.** Distributions of window size (kb) and the number of RAD tags sequenced (post filtering) within each window.

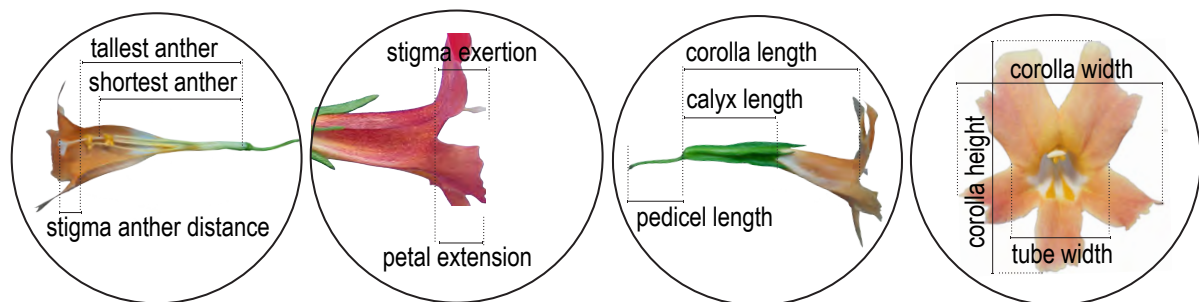

**Figure S3. Floral traits measured for the QTL analysis.** In addition to the size-related traits, we also measured anthocyanin and carotenoid pigment levels. Anthocyanins were extracted in 1% acidic methanol from a single disc collected from one of the top petals the first day each flower opened. Absorbance of extracts was measured with a spectrophotometer at 520 nm, as described previously (Streisfeld and Rausher 2009). Carotenoids were extracted in hexane following a similar protocol, and absorbance was measured at 450 nm.

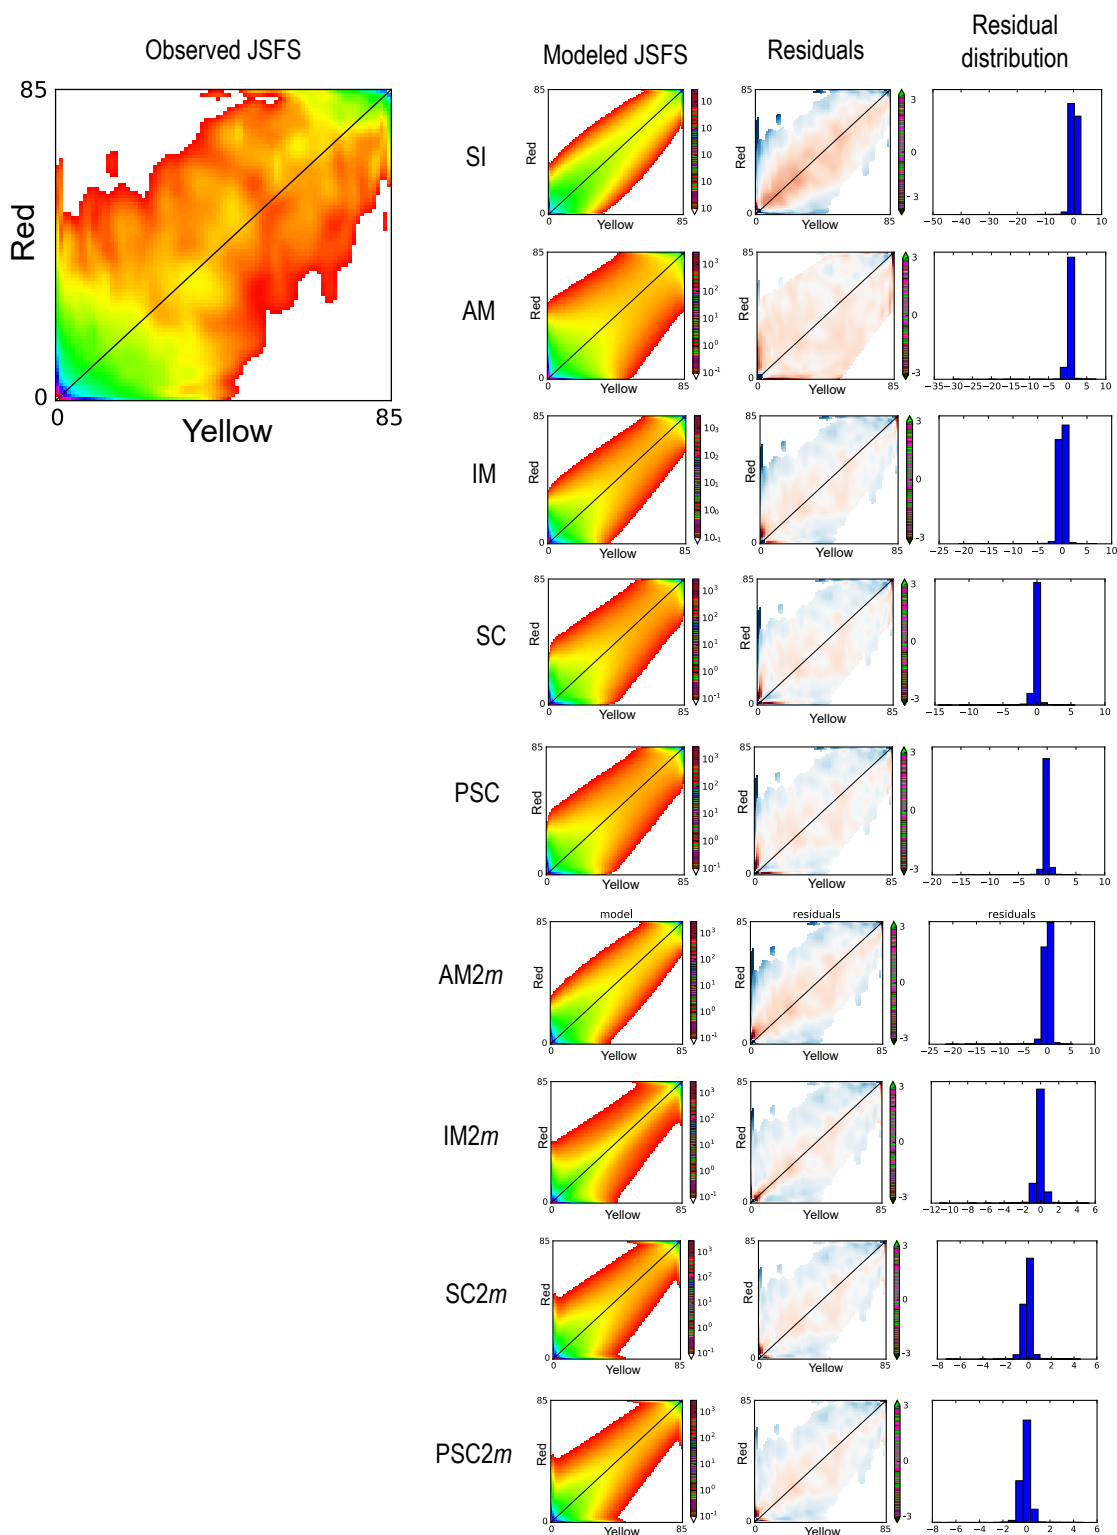

**Figure S4. Fits of the different demographic models to the observed data.** The observed unfolded joint site-frequency spectrum (JSFS) calculated from the RADseq data set is shown on the left. The first column shows the modeled JSFS for the best fit of each model (See Fig. S1 for a cartoon of each model). The second column shows the residuals of the best model fit to the observed JSFS. The third column shows the residuals plotted as a histogram.



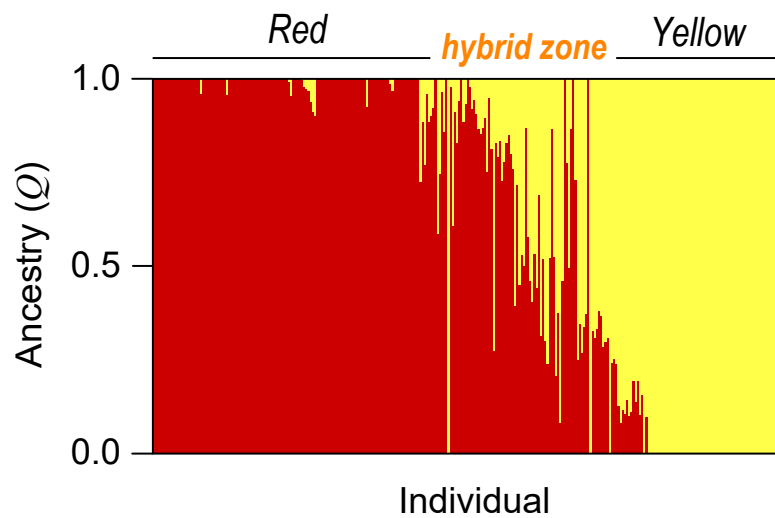

**Figure S5. The results of an *Admixture* analysis conducted on the full SNP dataset.** Each bar represents an individual and shows its probability of membership (Q score) to the two different clusters. Individuals are grouped by whether they come from the distribution of the red ecotype, yellow ecotype, or from within the hybrid zone.

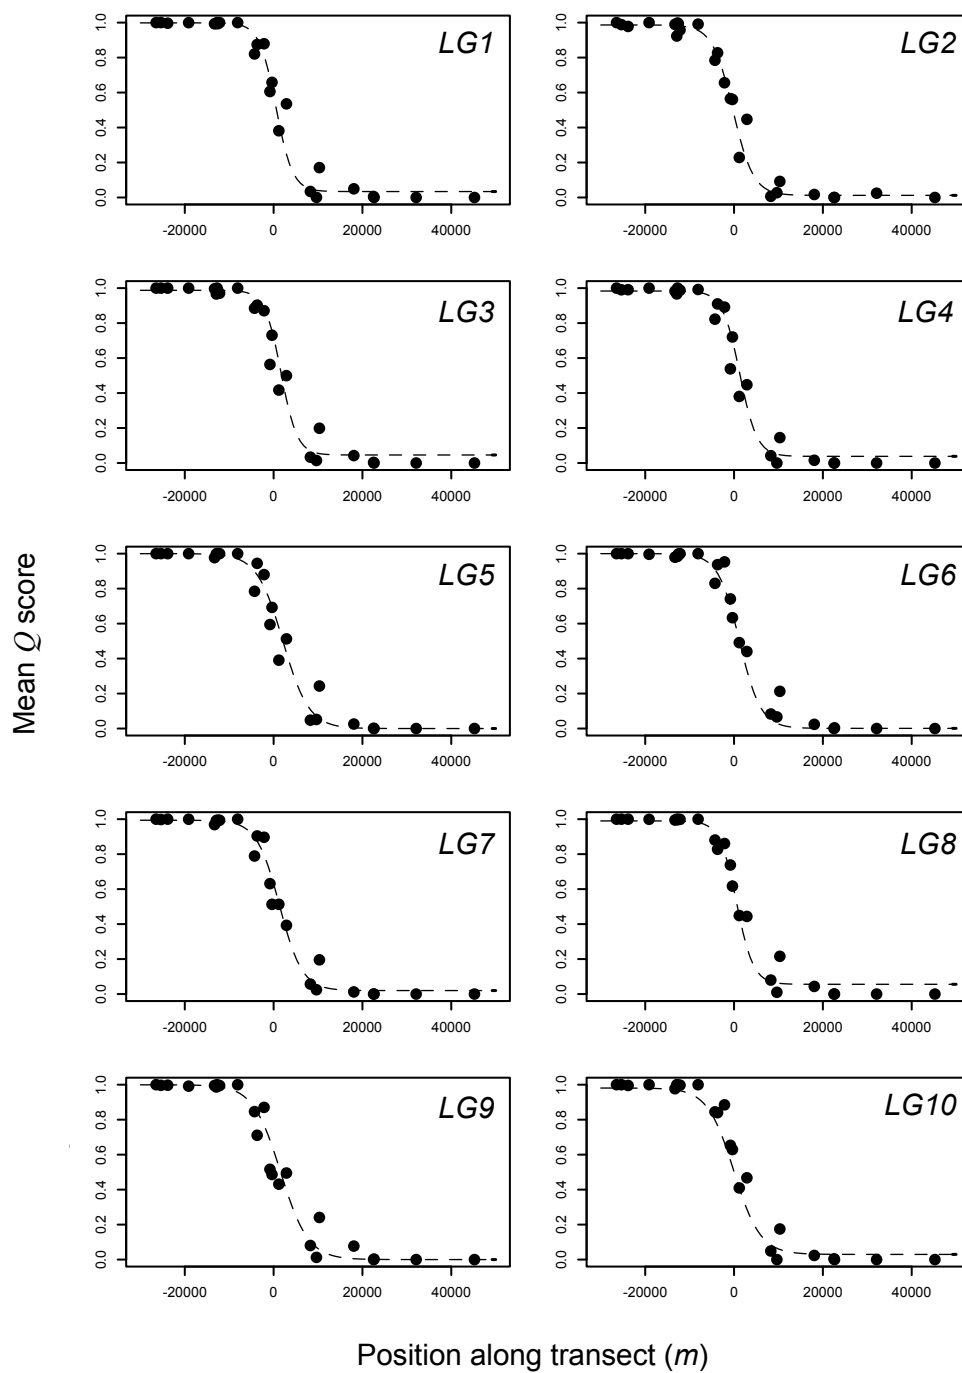

**Figure S6. Cline fits for each chromosome.** Black points are the mean ancestry scores plotted along the one dimensional transect. The dashed line is the ML sigmoid model.

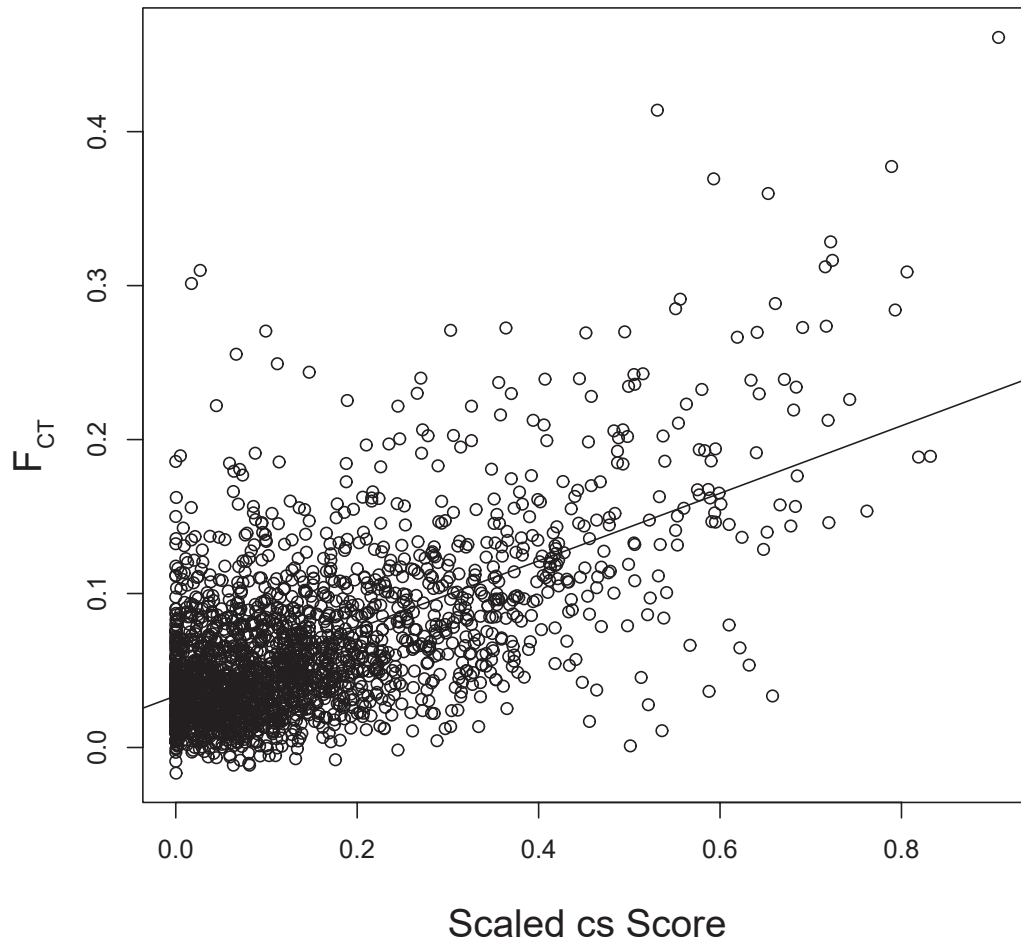

**Figure S7. Relationship between the cline similarity score (cs) and  $F_{CT}$ .** The line through the plot is the least squares regression ( $r^2 = 0.38$ ).

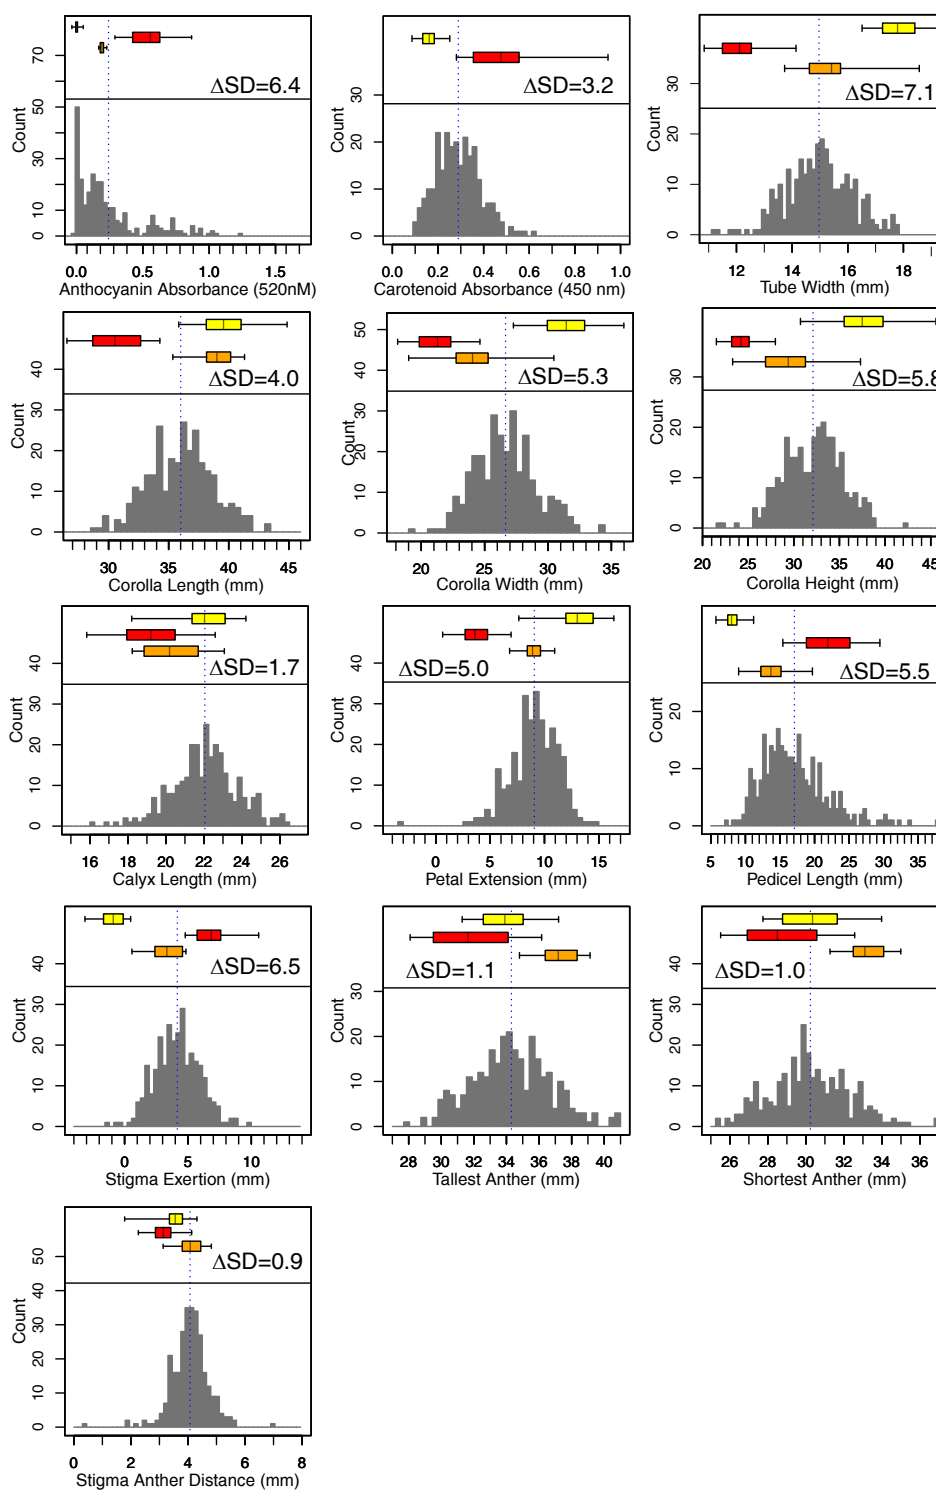

**Figure S8. Trait variation in greenhouse-raised red ecotype, yellow ecotype, F<sub>1</sub>, and F<sub>2</sub> individuals.** The histogram in each plot shows the distribution for each trait in the F<sub>2</sub> population. The top, middle and lower box plots show the distributions for the yellow ecotype, red ecotype and F<sub>1</sub>, respectively.  $\Delta$ SD indicates the number of standard deviation that the red and yellow ecotypes differ by.

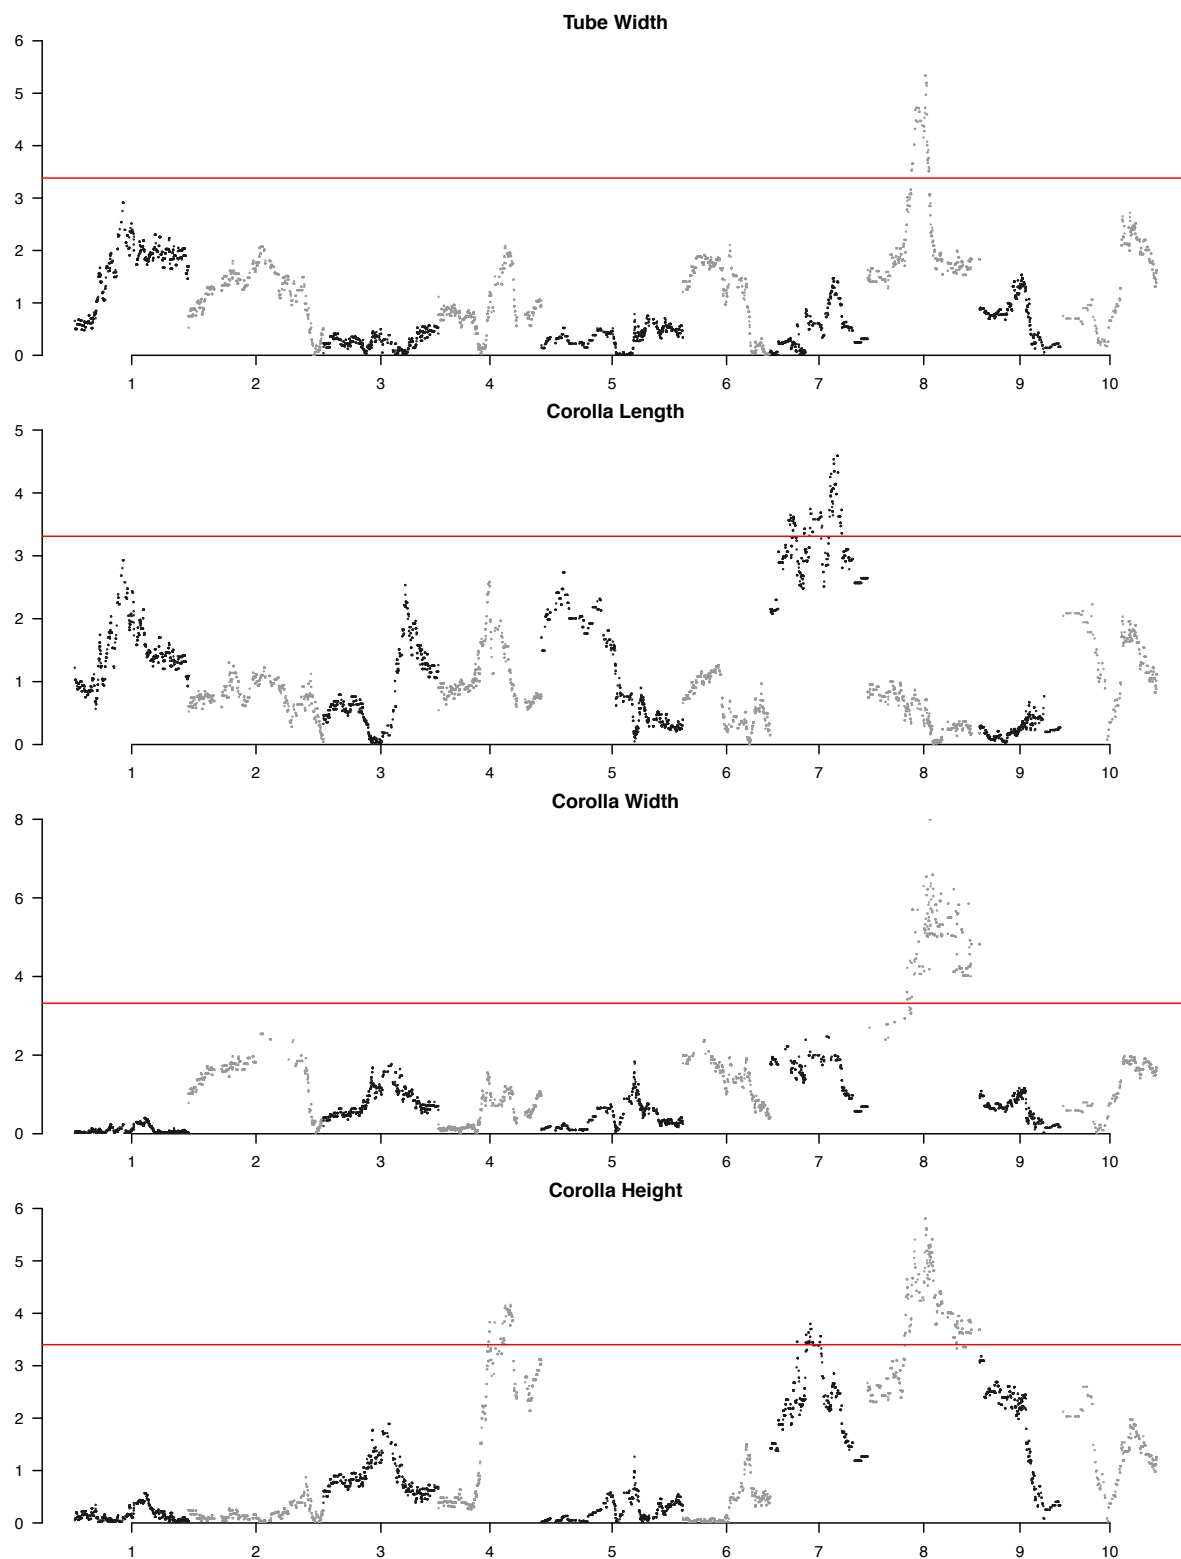

**Figure S9. LOD scores plotted across the genome for each trait in the QTL analysis.** The horizontal red line shows the LOD score cutoff for the detection of a significant QTL. Note the different y-axis scales among traits.

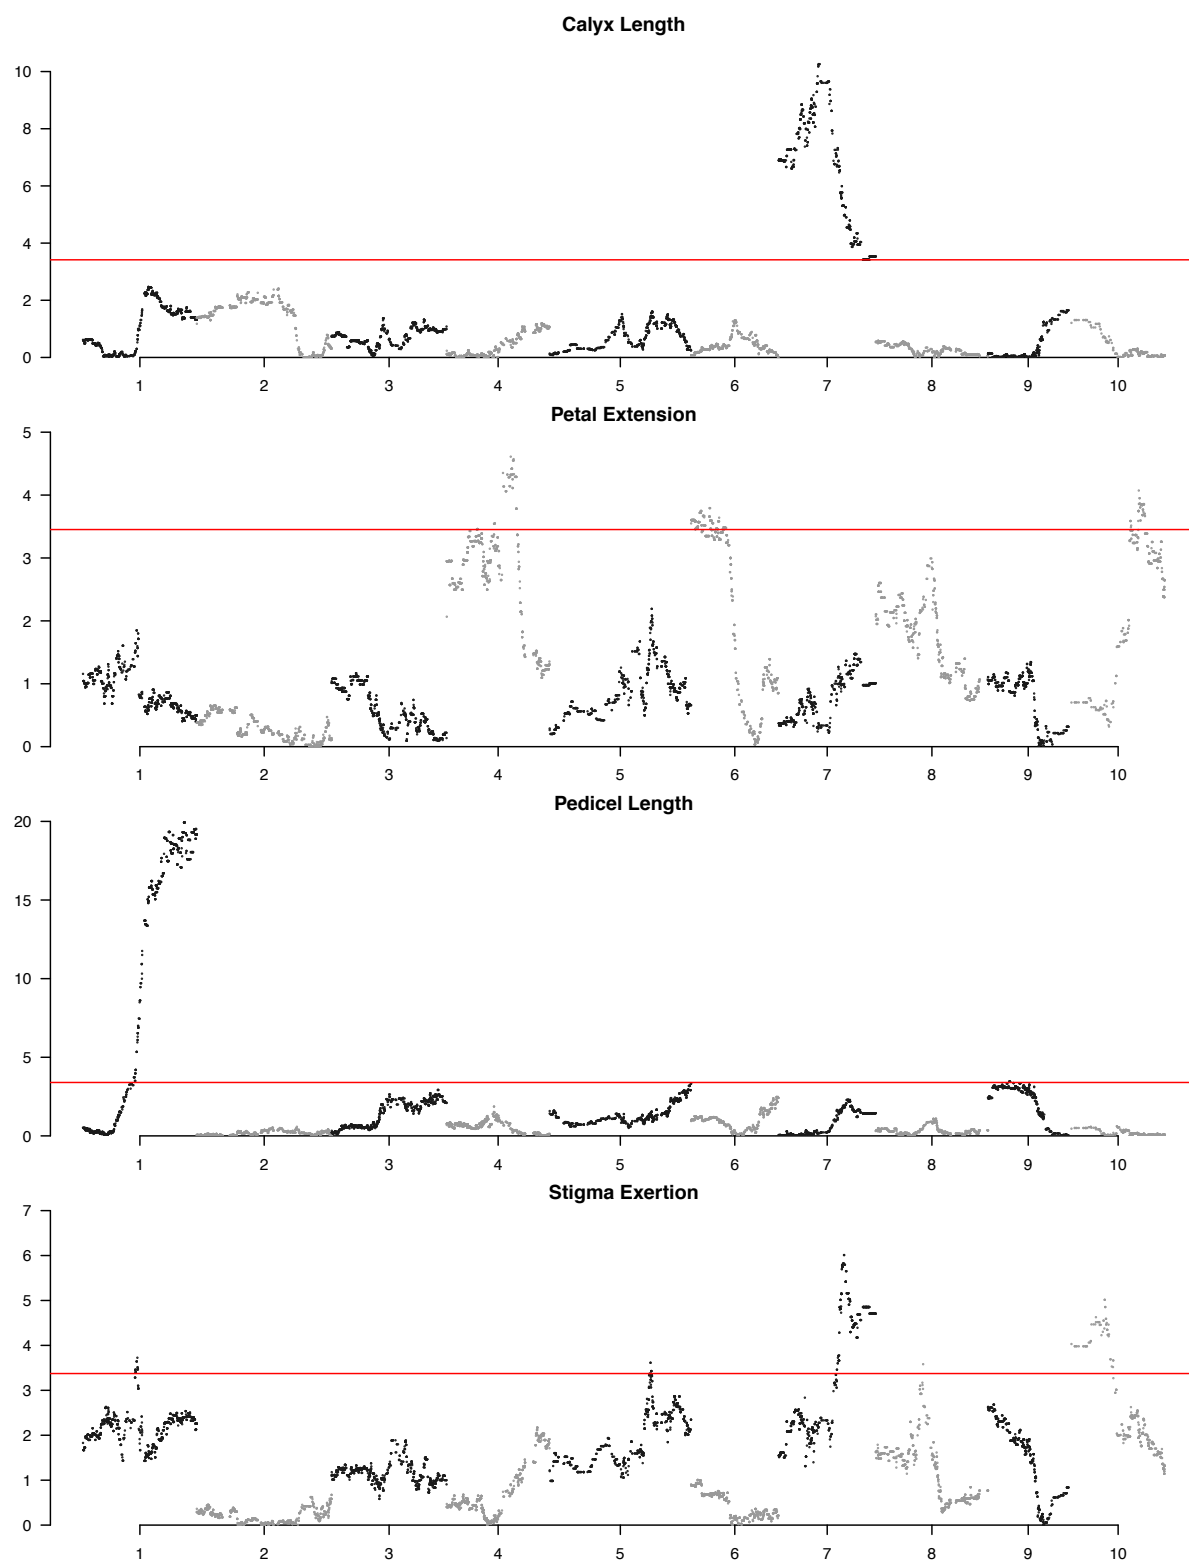

Figure S9 continued.

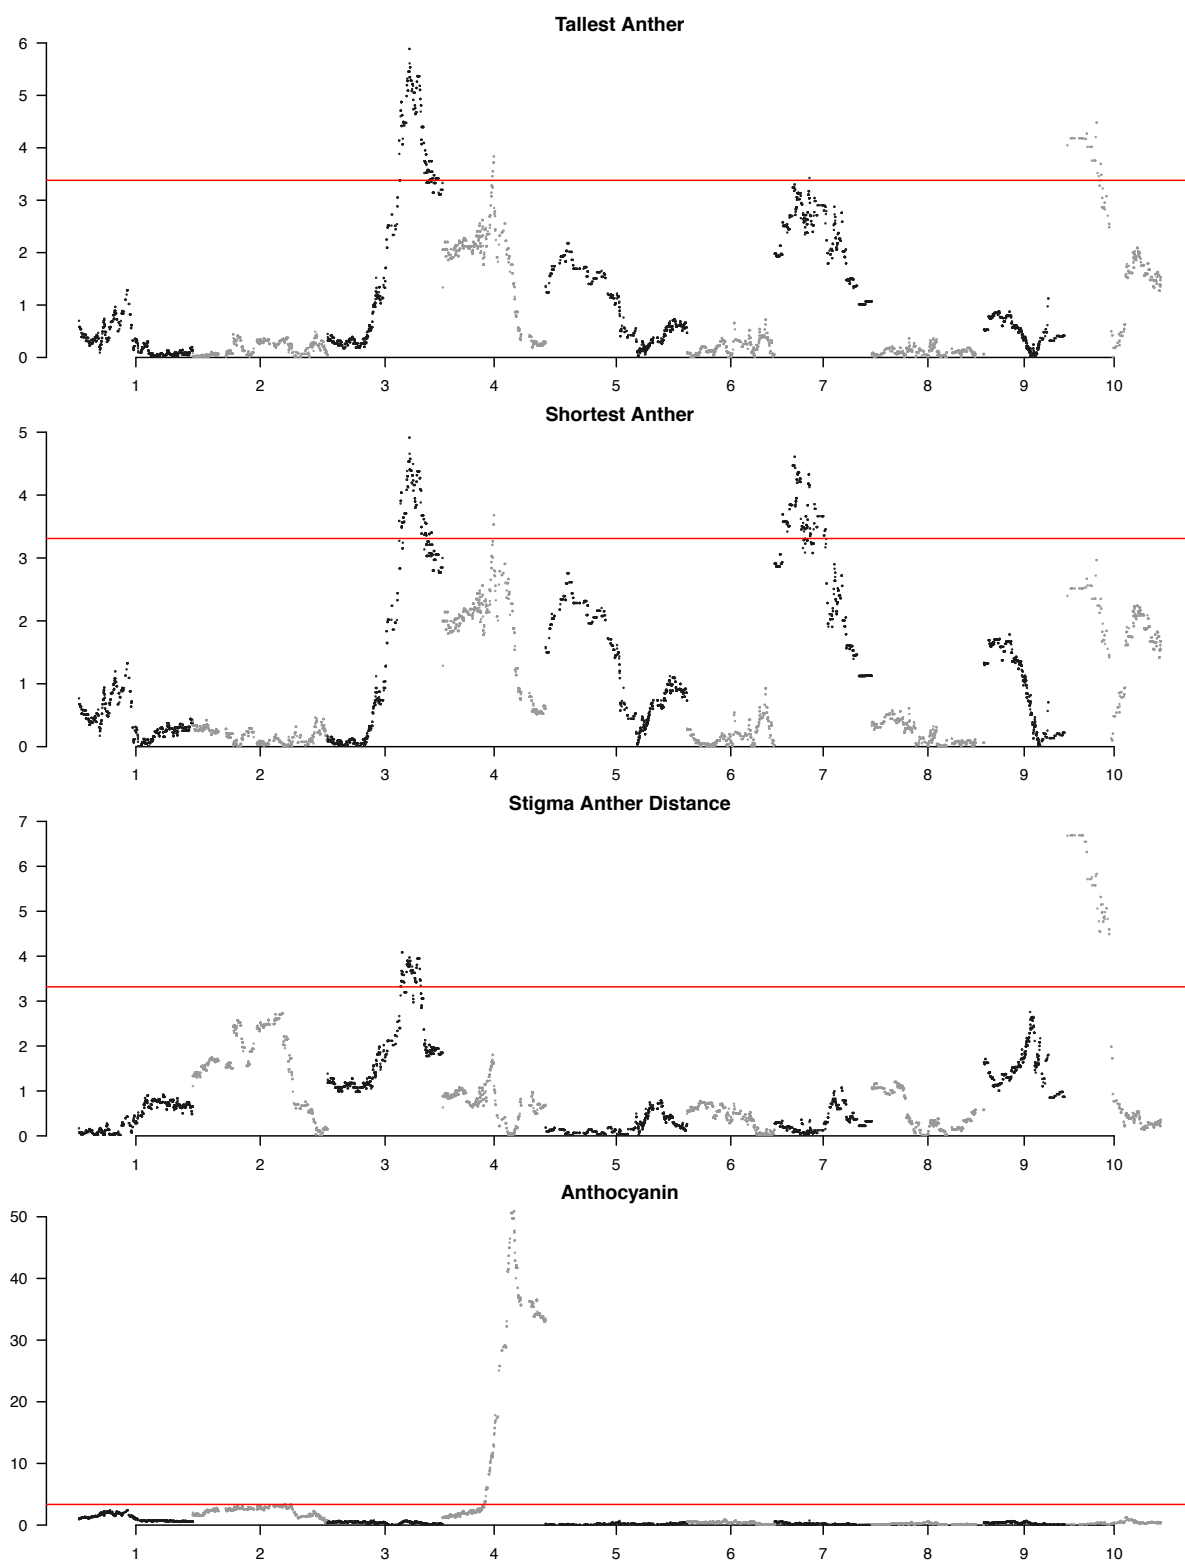

Figure S9 continued.

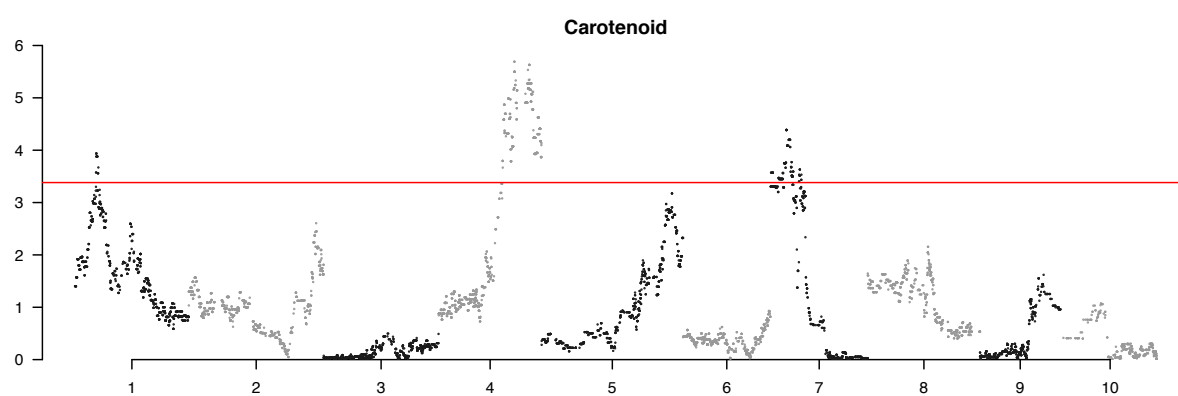

**Figure S9 continued.**



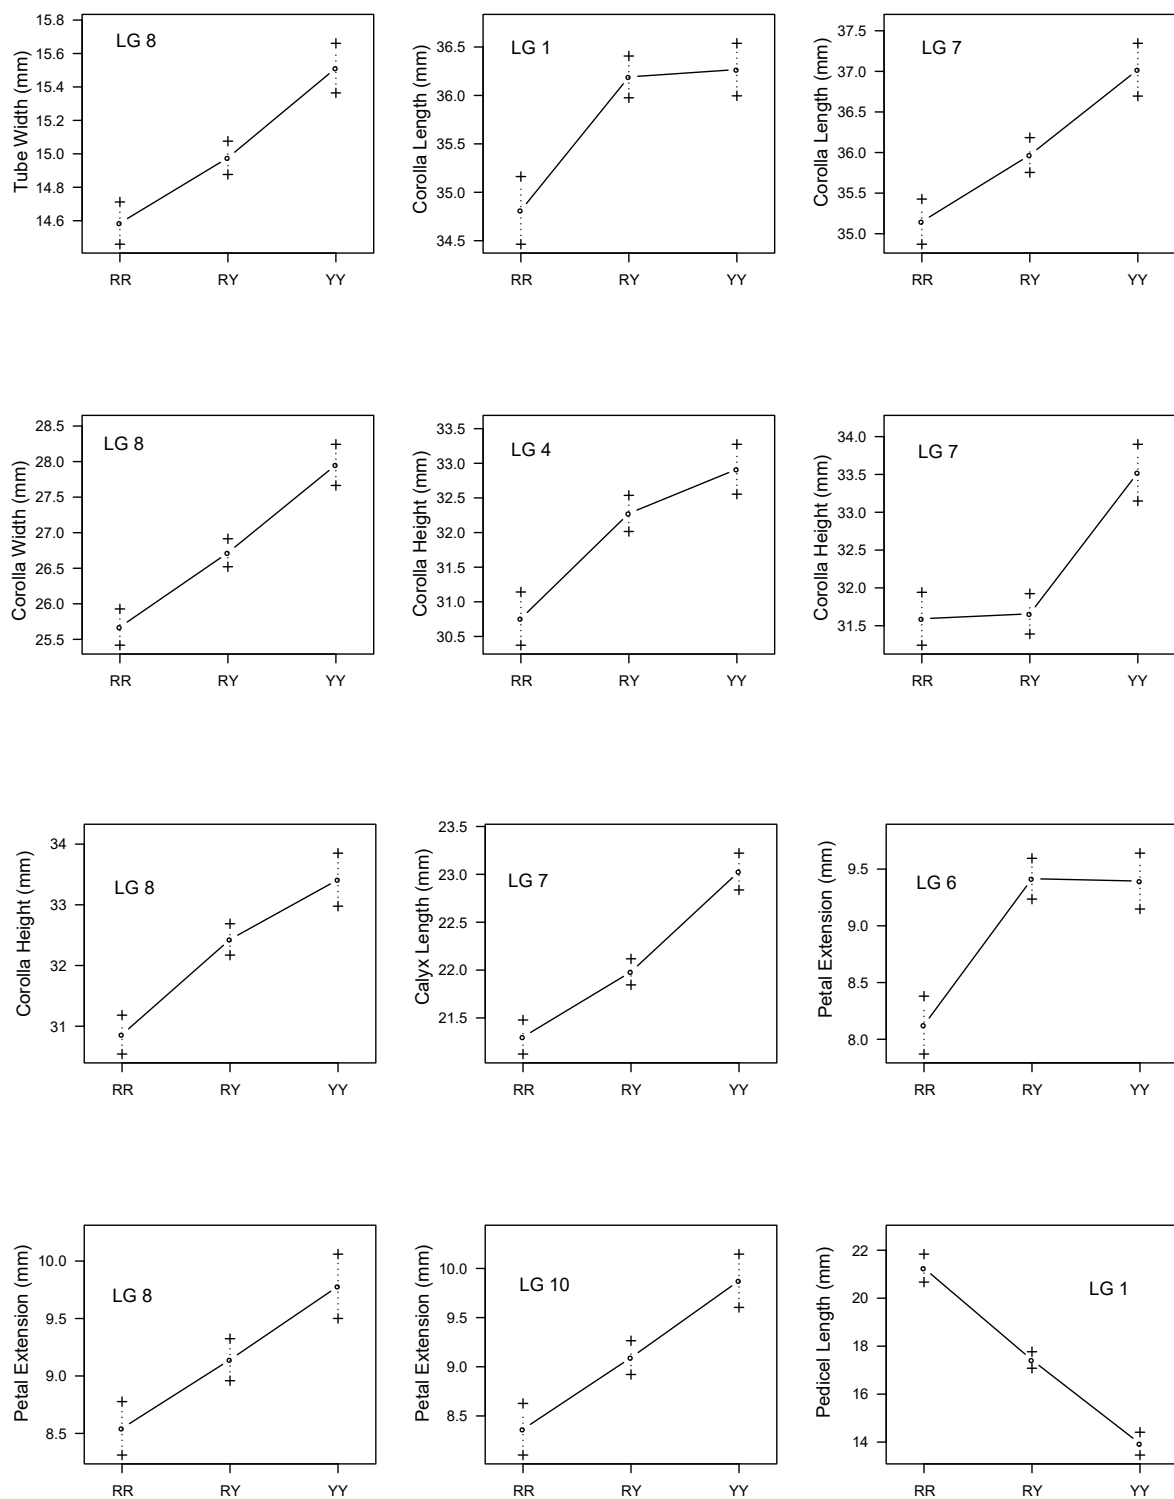

**Figure S10. QTL effect plots for each of the 26 QTL discovered in the analysis.** Each plot shows the mean (circle) and standard deviation (crosses) for each trait plotted against the three genotypes. RR, both alleles inherited from a red grandparent; YY, both alleles inherited from a yellow grandparent; RY, Heterozygous. Red lines indicate that the effect occurs in the opposite direction of that inferred by the trait differences measured in the red and yellow grandparents (see Fig. S8).

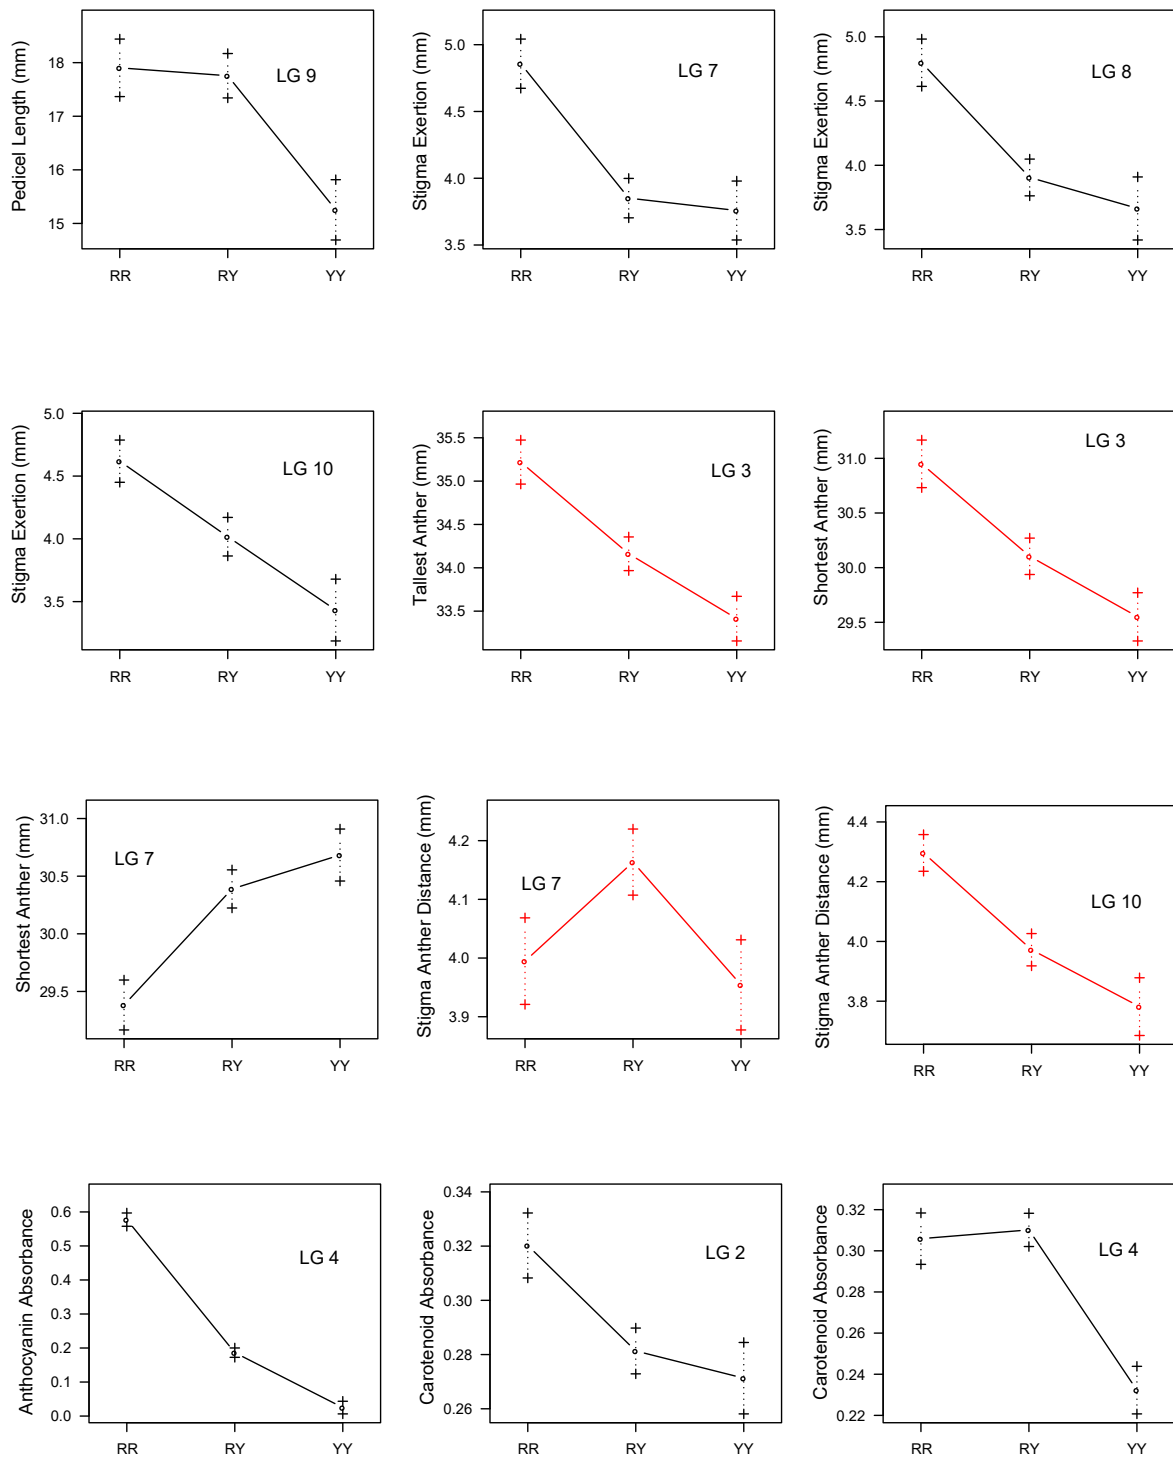

Figure S10 continued.

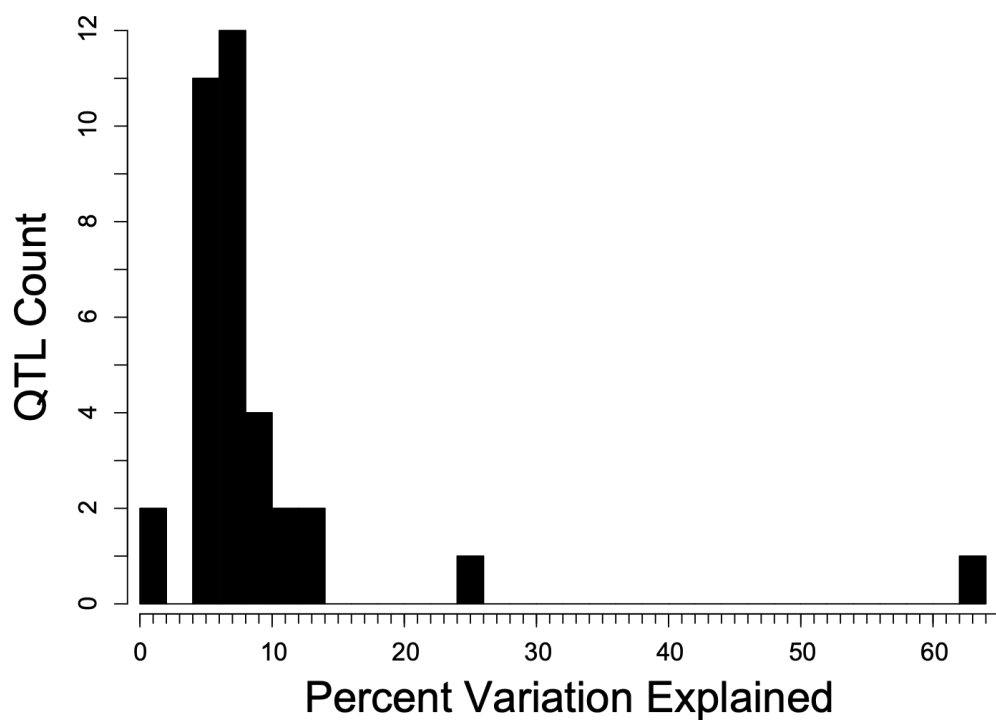

**Figure 11. Distribution of effect sizes (percent variation explained among F<sub>2</sub> plants) for the 26 QTL detected in the study.**

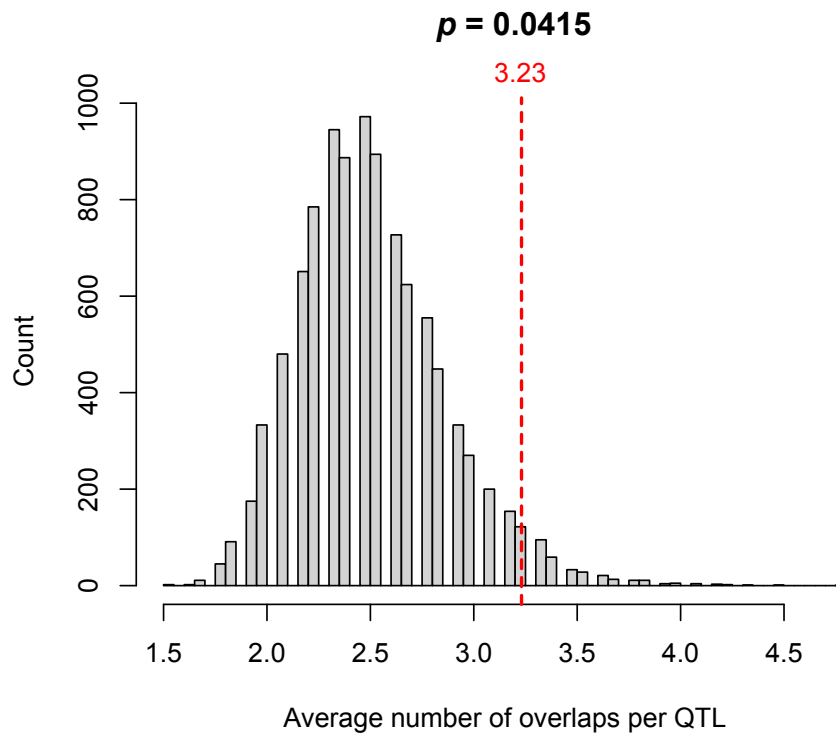

**Figure S12. Results from the permutation test for the significant colocalization of QTL.** The dashed red line shows the average number of observed overlaps per QTL, while the histogram shows the observed null distribution, generated from 9,999 random permutations. The  $p$ -value for the test is shown at the top of the plot.

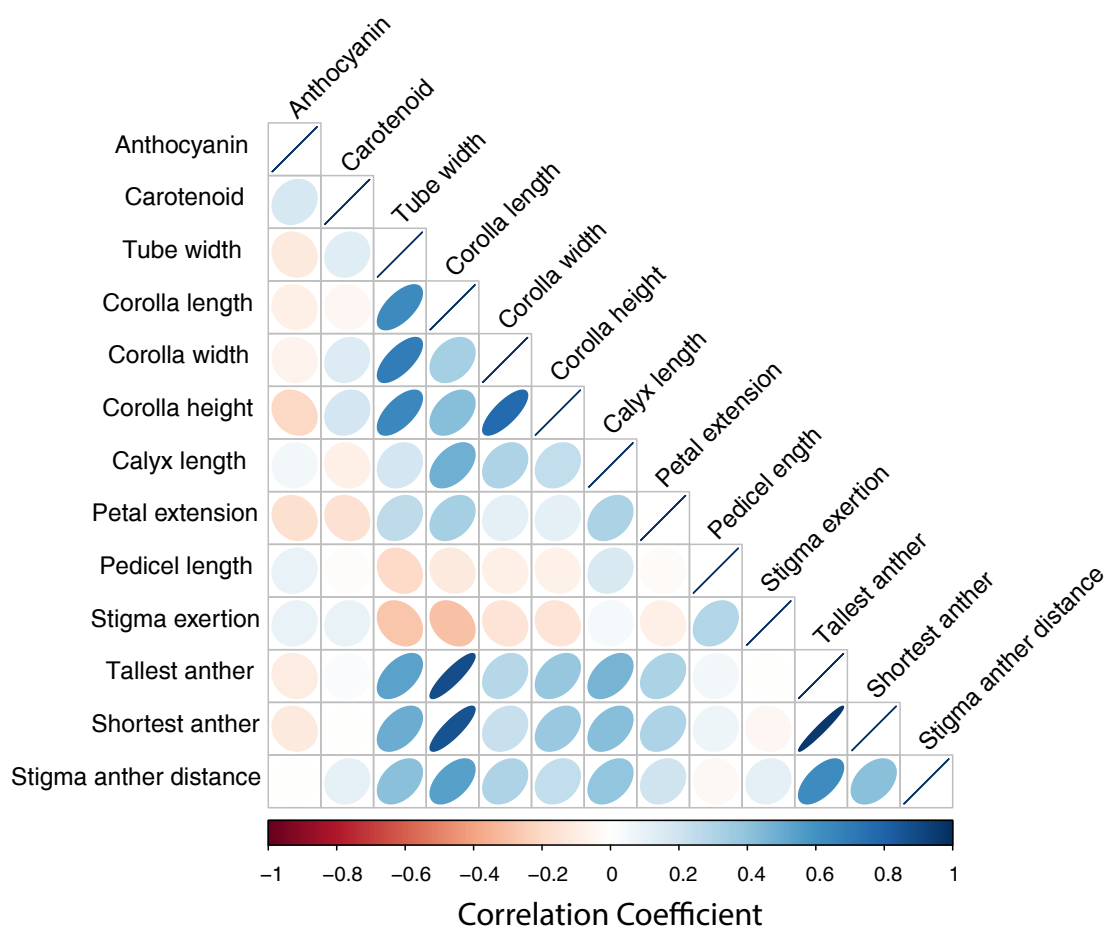

**Figure S13. Correlation matrix showing the Pearson correlation between each pair of traits in the F<sub>2</sub> population. The color and shape of each ellipse indicates the strength and direction of each correlation.**

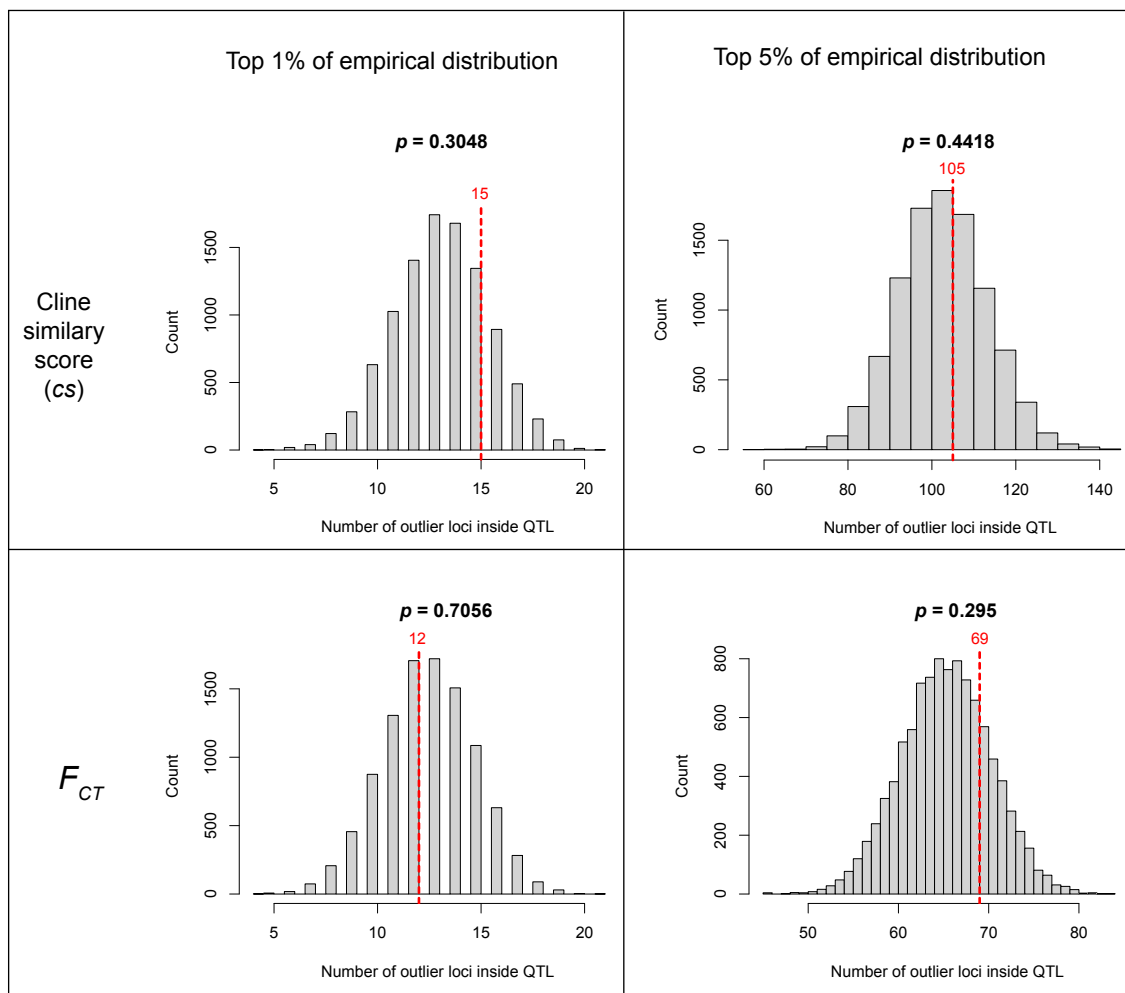

**Figure S14. Results from the permutation tests for significant enrichment of candidate barrier loci within the QTL Bayes credible intervals.** The test is performed with two different arbitrary cutoffs for defining candidate barrier loci (top 1% and top 5% of the distribution) for two different statistics (the cline similarity score and  $F_{CT}$ ). The red line shows the observed number of candidate barrier loci falling within the QTL intervals, while the histogram shows the observed null distribution, generated from 9,999 random permutations. The  $p$ -value for the test is shown at the top of the plot.

## Supplement 1:

# Calculation of ‘cline similarity’ score

### Rationale

This supplement outlines the rationale behind the calculation of the cline similarity score, which describes the relative shape and position of a cline, relative to some other cline of interest. In our case, we wanted to be able to view the variation in multiple parameters that describe different features of a geographic cline in an integrated way, so we could do things, like plot clinal variation along a genome.

Consider a simple, sigmoid cline, like the one shown in Figure A. This cline model, which is the most commonly used in empirical studies, is described by 4 fitted parameters: the cline centre ( $c$ ), cline width ( $w$ ), the mean trait value on the ‘high’ side of the cline ( $Q_{\max}$ ), and the mean trait value on the ‘low’ side of the cline ( $Q_{\min}$ ). The last 2 parameters can be reduced to a single parameter,  $\Delta Q = Q_{\max} - Q_{\min}$ , which quantifies the total change in a trait across the transect. It is worth noting that we use the notation  $\Delta Q$  to denote change in ancestry scores across the cline, rather than  $\Delta z$ , which is typically used for a quantitative trait (or  $\Delta p$  for allele frequency).

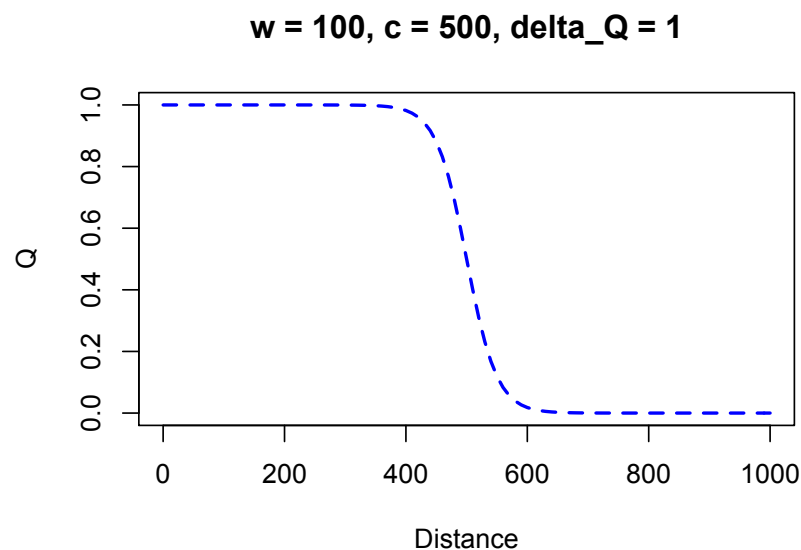

**Fig. A. Simple sigmoid cline model described by 3 parameters,  $\Delta Q$ ,  $w$ , and  $c$ .**

Each parameter tells us something about the feature of the cline and is relevant to inferences that we might make about selection in a hybrid zone (provided that we are happy to make some assumptions). For example, the width of the cline is inversely proportional to the strength of selection acting on the trait; the centre tells us about the spatial pattern of selection across the hybrid zone; and the change in the trait value across the cline tells us about the strength of the difference in the trait across the cline. In a situation where selected and neutral loci are at equilibrium, the above cline would indicate that variation in the trait is maintained by selection.

The problem is that inferences cannot easily be made from a single cline parameter. This is highlighted in Figure B, where several clines are shown, with certain parameters fixed and others varying. The left plot shows three clines with the same values of  $w$  and  $c$ , but substantially different values of  $\Delta z$ ; The middle plot shows multiple clines with the same values of  $\Delta z$  and  $c$ , but with different values of  $w$ ; the third shows clines with identical shapes (i.e., same  $\Delta z$  and  $w$ ), but different values of  $c$ .

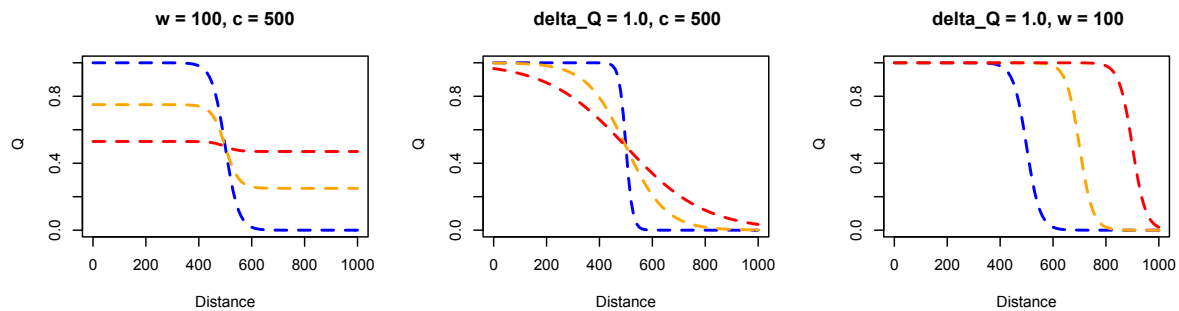

**Fig. B. Examples of clines where a single parameter varies but the other two parameters are fixed.**

In the above plots, we can easily evaluate each cline in terms of its fit to some hypothesis by visually inspecting them. However, when we have many clines, this is impractical and highly subjective. But these plots clearly show that we cannot infer much by looking at the distribution of a single parameter, especially in real data where all parameters will vary simultaneously.

### The ‘cline similarity’ score

To help simplify the process of identifying clines of interest, we created an *ad-hoc* statistic that we call the ‘cline similarity’ or ‘ $cs$ ’ score. The  $cs$  score summarises cline shape and relative position with a single number that can be calculated from the ML cline parameters.  $cs$  is calculated as:

$$\text{Cline similarity, } cs = \left( \frac{\Delta Q}{w+l} \right) e^{-(l/c/l)^2} \quad (\text{eq. 1}).$$

Where  $\Delta Q$ ,  $w$  and  $c$ , are defined as above and  $l$  is a scaling factor that will be explained further below. Eq. 1 can be broken down into two terms that determine the  $cs$  score in different ways. The first term is a shape score, that describes the shape of a cline, independent of the location of the cline centre:

$$\text{Shape score} = \left( \frac{\Delta Q}{w+l} \right) \quad (\text{eq. 2}).$$

The second term is a centre penalisation score, which downgrades the shape score based on the value of the fitted cline centre relative to some point of reference (explained further below).



$$\text{Centre penalisation score} = e^{-(l/l)^2} \quad (\text{eq. 3.}]$$

These formulae and the decisions made to arrive at them will next be explained by walking through its calculation for the *Mimulus* dataset.

### Application to the *Mimulus* dataset

For the *Mimulus* dataset, we fit clines to ancestry scores in 2,173 non-overlapping windows, each containing 100 SNPs. The details of how the fits were done are described in the main text, but the clines can be fitted in any way. We only need the parameters for the fitted model to calculate  $cs$ .

Starting with the shape score, we wanted a quantity that described variation in the shape of the cline. Ultimately, we wanted clines with a small  $w$  and large  $\Delta Q$  to have high shape scores, and clines with very low  $\Delta Q$  and high  $w$  to have a low shape scores. Figure C shows the joint distribution of  $\Delta Q$  and  $w$  for all of the windows. The numbers in the plot correspond to the cline fits for 10 selected windows, which are shown on the right side of the plot. The orange star (cline 2), is not for a specific window, but rather is the fit to mean  $Q$  score for each location, averaging across all windows (i.e., it is a cline fitted to the mean of means for each location). The green star shows the location of the genome-wide cline in this space (i.e., the one shown in figure 3a of the main text, and figure D (ii)).

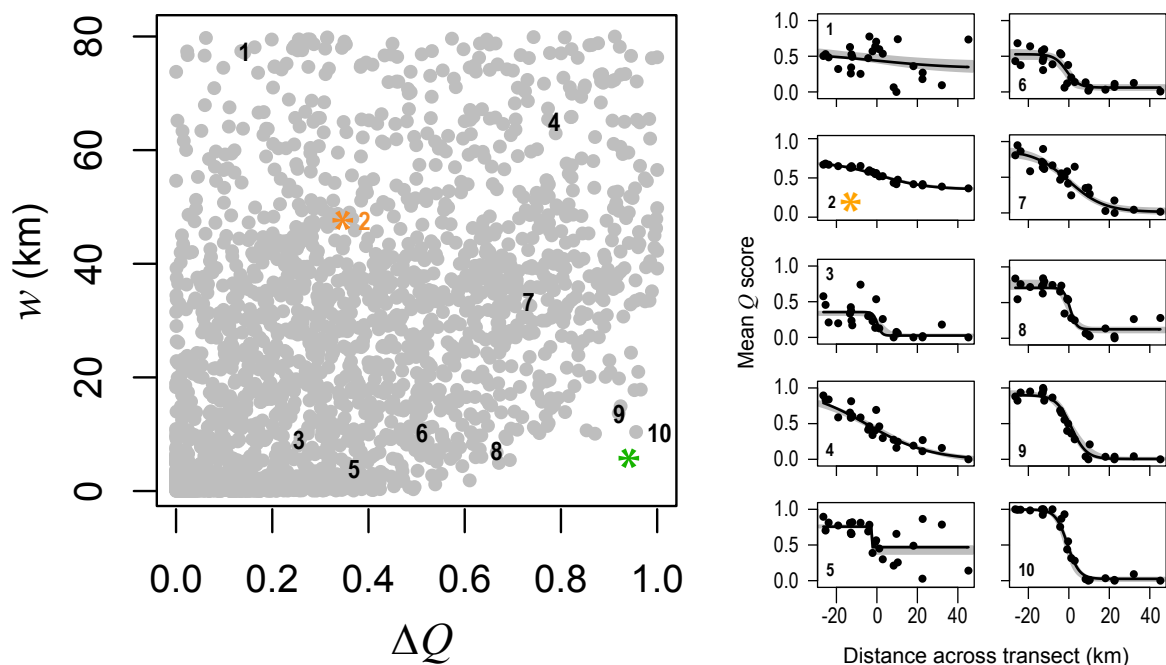

**Fig. C. Joint distribution of  $w$  and  $\Delta z$  for the *Mimulus* dataset.** The clines on the right show fits that correspond to the numbers in the bivariate plot.

The bottom right corner of Figure C contains the clines that are most interesting in terms of our hypothesis regarding barrier loci. The ones in the top left and bottom left are of little

interest, because  $\Delta Q$  is always very small. The ones in the top right are more interesting, because they show high  $\Delta Q$  but are very wide; these clines could be generated by processes like isolation by distance, or the collapse of secondary clines when barriers to gene flow are porous.

Figure D(i) shows the same plot, but with the points coloured by the shape score (10 coloured bins, but the values are continuous), as given in Eq. 2. Here we define  $l$ , the scaling parameter, as  $0.5t$ , where  $t$  is the length of the transect.  $l$  determines precisely how variation in the shape scores is spread out across the joint distribution of  $\Delta Q$  and  $w$ . In our case,  $0.5t$ , gives a distribution shape scores that suits our purposes, but other values might be more suitable for other study systems.

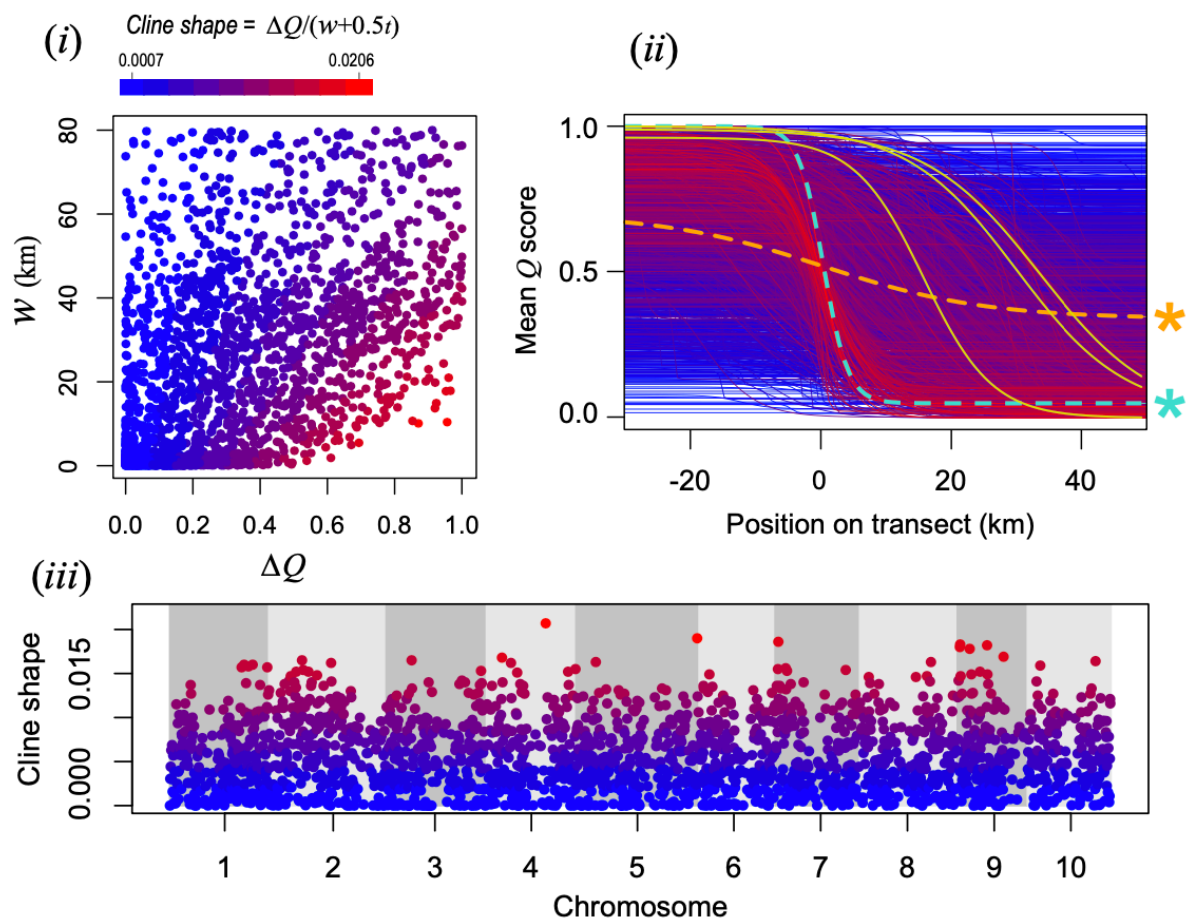

**Fig. D. Shape scores for the 2,173 windows.** (i) Joint distribution of  $w$  and  $\Delta Q$ , coloured by the shape score. (ii) Cline models coloured by the shape score. (iii) The shape scores plotted across the genome. See text for more details.

By colouring the cline models for each window by their shape scores, as shown in Figure D(ii), we can see that clines with ‘hotter’ colours do have shapes more similar to the genome wide cline (the dashed cyan line) than ‘cooler’ colours. However, it is also clear that some clines with high shape scores have centres that are displaced a very long way from the genome wide cline. Some of these have been coloured solid yellow to help highlight them.

Although these clines are interesting for a variety of reasons, they are not spatially associated with the centre of the hybrid zone that also coincides with the transition in floral trait differences. Ideally, we would like our summary statistic to also reflect where the cline is positioned in relation to this location. To do this, we penalise the shape score based on the position of the cline centre, relative to a position of interest, which needs to be given position 0. This could be a feature of the environment or a cline in a focal marker or trait. In our case, the position of interest is the centre of the genome-wide ancestry cline.

Figure E(i) shows how the value of the inferred centre informs the centre penalisation function outlined in Eq. 3. If the fitted cline centre coincides exactly with the point of interest ( $c = 0$ ), the  $cs$  score for that cline is simply the shape score (i.e.,  $cs = \text{shape score}$ ). However, as the difference between fitted centre and point of interests increases (i.e.,  $|0 - c|$ ), then the shape score is downgraded according to the centre penalization function, resulting in a  $cs$  score lower than the shape score.

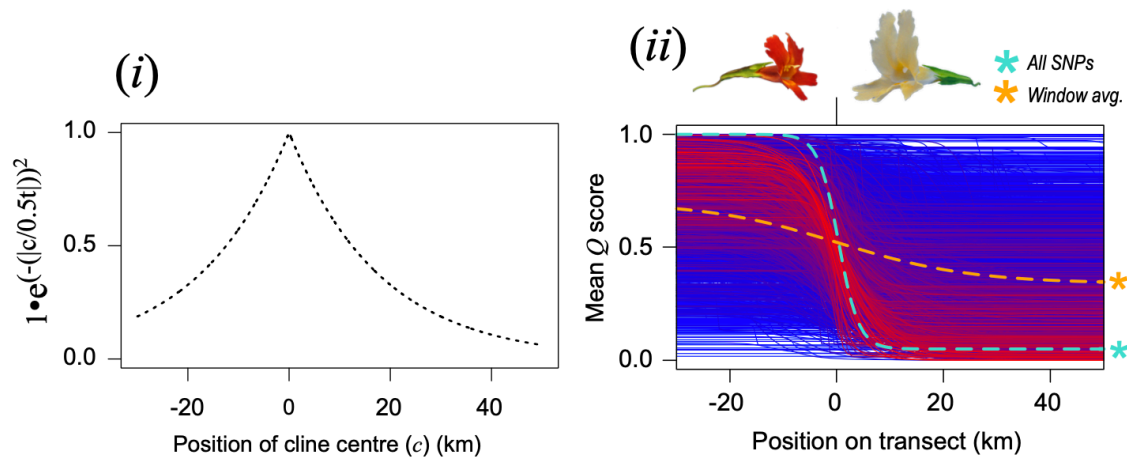

**Figure E. Penalisation of the shape score to give the final  $cs$  score.** (i) The effect of the cline centre penalisation function on the shape score. Here, an arbitrary shape score of 1 is used for illustrative purposes. (ii) The cline models for all windows after the cline penalisation score, coloured by the overall  $cs$  score.

The results of this final transformation step can be seen in figure 3c of the main text, which is reproduced in Figure E(ii) for convenience. In that figure, the  $cs$  scores are scaled between 0 and 1, where 0 is the cline with the lowest  $cs$  score, and 1 is the  $cs$  score for the genome-wide cline.

### Some afterthoughts (if others attempt something similar)

This was done 5 years ago and if I was doing this again from scratch, I would probably think about it a bit differently. First, I think it might be useful to try and incorporate the variance explained by the cline model into the  $cs$  score. i.e., if the data around the cline are extremely noisy (common for clines with a small  $\Delta Q$ , e.g., cline 1 in Figure C), we might conclude that these are less likely to be of interest. The variance explained was used primarily in Westram et al. 2017 and seemed to be good at identifying non-neutral clines in simulations.
